# Supplementary material for: Effectiveness of Family-Based Behavior Change Interventions on Obesity-Related Behavior Change in Children: A Realist Synthesis
Source: Int J Environ Res Public Health. 2020 Jun 8;17(11):4099. doi: 10.3390/ijerph17114099 (PMC7312889; doi:10.3390/ijerph17114099)
Supplement: Supplementary file 1 [file ijerph-17-04099-s001.xlsx]

## Sheet: Table S1a Appraisal summary
**Appraised by MAF as a second rater (n=12/38 interventions) 32% Note for study appraisal both original studies analysed by Fisher et al 2018 were appraised despite Study 2 being excluded from the review due to the focus being on preschool age children.
Authors	Study design	Rigor rating (low, unclear high risk of bias) *studies were not excluded from the realist review on the basis of the rigor rating	Appraisal used	Notes on strengths and limitations	Relevance rating	Relevance appraisal Discussion of (i) parent involvement (ii) theory, (iii) BCTs and mechanisms
**Anderson, J.D., Newby, R., Kehm, R., Barland, P. & Hearst, M.O. 2015	Quasi-experimental (pre-post + qualitative component)	WEAK	Joanna Briggs Institute Critical Appraisal - Checklist for Quasi-Experimental Studies (non-randomized experimental studies)	Limitations Small sample size affects ability to detect sig changes in health-related behaviours and reduces generalisability of the results. High rate of attrition. Only 1/3 of participants completed the intervention, with barriers cited as scheduling and transporation issues. Affects interpretation of positive findings as the subset of families participating until the end may have been more mot…	STRONG	(i) Clear desciption of parent involvement (ii) Discussed causal pathways, using theory. Self-efficacy and intrinsic motivation not directly measured though integral to the intervenion (iii) Good detail on BCTs with examples
Epstein, L.H., McKenzie, S. J., Valoski, A., Klein, K. R. & Wing, R R. 1994	RCT	1. Selection bias Random sequence generation: Unclear Allocation concealment: Unclear 2. Performance bias Blinding of participants and personnel: Unclear 3. Detection bias Blinding of outcome assessment: Unclear 4. Attrition bias Incomplete outcome data: Unclear 5. Reporting bias Selective reporting: Unclear 6. Other bias: Unclear	Cochrane Risk of Bias tool	Limitations Used a non comparable classification of OW/OB Habit books were available for 38 of the 39 children. However, based on the completeness of recording, a varying amount of adherence data could be scored from the records. In cases where the records were not complete, data for that subject for that variable was not used, rather than assuming the subject did not meet the requirement. Design…	STRONG	(i) Clear desciption of parent involvement (ii) Considerd indivudual rates of learning - e.g. The effects of treatment might be improved by matching the introduction of skills and reinforcement for behavior change to the subject’s skill level and progress (iii) detailed descriptions of BCTs with examples
Epstein, L.H., Paluch, R.A., Kilanowski, C K. & Raynor, H.A. 2004	Quasi-experimental (2-arm randomised study with no control arm)	1. Selection bias Random sequence generation: Unclear Allocation concealment: Unclear 2. Performance bias Blinding of participants and personnel: Unclear 3. Detection bias Blinding of outcome assessment: Unclear 4. Attrition bias Incomplete outcome data: Low 5. Reporting bias Selective reporting: Unclear 6. Other bias: Unclear	Cochrane Risk of Bias tool	Strengths Randomised and blinded Used a dichotomous measure instead of a continuous variable. May lose some power in determining relationships between variables, but the classification of participants as substituters or complementers provided an individual-difference variable consistent with the theory that was being tested and the asymmetrical nature of the relationship between sedentary behavio…		(i) Clear desciption of parent involvement (ii) Discusses mechanisms and theory based (iii) Detailed descriptions of BCTs with examples
**Fisher, A., Hammersley, M.L., Jones, R.A., Morgan, P. J., Collins, C.E. & Okely, A. 2018	Study 1 (3-arm RCT) Study 2 (pre-post)	Study 1 1. Selection bias Random sequence generation: Low Allocation concealment: Low 2. Performance bias Blinding of participants and personnel: Unclear 3. Detection bias Blinding of outcome assessment: High 4. Attrition bias Incomplete outcome data: Low 5. Reporting bias Selective reporting: Low 6. Other bias: Unclear Study 2: WEAK	Study 1: Cochrane Risk of Boas tool Study 2: Joanna Briggs Institute Critical Appraisal - Checklist for Quasi-Experimental Studies (non-randomized experimental studies)	Limitations Small sample	STRONG	(i) Clear desciption of parent involvement (ii) Includes theory. Compares contextual factors with another study using the same variables - though the other study did not fit criteria for this review. Discusses automomous goal setting (by parents) and intrinsic motivation (of chlidren) (iii) Detailed descriptions of BCTs with examples
Golan, M., Fainaru, M. & Weizman, A. 1998	Quasi-experimental 1yr longitudinal prospective, 2-arm randomised with no control arm)	1. Selection bias Random sequence generation: Unclear Allocation concealment: Unclear 2. Performance bias Blinding of participants and personnel: Unclear 3. Detection bias Blinding of outcome assessment: Unclear 4. Attrition bias Incomplete outcome data: High 5. Reporting bias Selective reporting: Low 6. Other bias: Unclear	Cochrane Risk of Bias tool	Limitations Small sample Old study	STRONG	(i) Compares two experimental conditions - parents (vs children) as exclusive agents for change (ii) A lot of detailed discussion on mechanisms and contextual influences. But does not discuss theory in relation to results (iii) Detailed descriptions of BCTs with examples
**Maddison, R., Marsh, S., Foley, L., Epstein, L.H., Olds, T., Dewes, O., Heke, I., Carter, K.,Jiang, Y. & Mhurchu, C.N. 2014	RCT (2-arm parallel)	1. Selection bias Random sequence generation: Low Allocation concealment: Low 2. Performance bias Blinding of participants and personnel: High 3. Detection bias Blinding of outcome assessment: High 4. Attrition bias Incomplete outcome data: Low 5. Reporting bias Selective reporting: Low 6. Other bias: High	Cochrane Risk of Bias tool	Strengths Randomized design, collection of PA data from the child and their primary caregiver, use of measurement tools (MARCA and FFQ) that have previously been validated in similar populations, adequate sample size to detect change in BMI, and a relatively long follow-up. Focussed on reducing sedentary screen time, rather than incorporating other health messages, and utilised a TV locking devic…	STRONG	(i) Clear desciption of parent involvement (ii) Thorough description of underpinning theory and how relates to behaviour change strategies adopted (iii) Detailed description of BCTs with examples
Yusop, N.B., Mohd Shariff, Z., Hwu, T.T., Abd Talib, R. & Spurrier, N. 2018	RCT	1. Selection bias Random sequence generation: Low Allocation concealment: Low 2. Performance bias Blinding of participants and personnel: Unclear 3. Detection bias Blinding of outcome assessment: Unclear 4. Attrition bias Incomplete outcome data: High 5. Reporting bias Selective reporting: High 6. Other bias: Unclear	Cochrane Risk of Bias tool	Strengths To guarantee allocation concealment, the randomization was carried out by an independent third party Showed the importance of delivering information or conducting programmes according to the SOC of the targets. The SOC approach can help policymakers make the best use of scarce resources by targeting nutrition programmes to match individuals’ readiness to change Limitations Use of a thre…	STRONG	(i) Limited desciption of parent involvement (ii) Thorough description of underpinning theory and how relates to behaviour change strategies adopted (iii) Detailed description of BCTs with examples
Siwik, V., Kutob, R. Ritenbaugh, C., Cruz, L., Senf, J.,Aickin, M., Going, S. & Shatte, A. 2013	Quasi-experimental (Lagged intervention/ control with 'design-adaptive allocation')	MODERATE	Joanna Briggs Institute Critical Appraisal - Checklist for Quasi-Experimental Studies (non-randomized experimental studies)	Strengths Design-adaptive allocation usde to minimize the differences between groups as participants entered the study. Balancing factors were sex, age, and BMI Although self-reports have the potential for bias, this type of recall was deemed appropriate to the age group since it has been previously used and validated in a multisite, school-based obesity intervention study for this age group. It …	STRONG	(i) Clear desciption of parent involvement (ii) Explains how intervention components were based on a psychological model for fostering resillience Qualitative data adds insight to discussion of mechanisms (e.g. building self-efficacy and role of the parents), and exemplifies the integration of the resilience component (iii) Detailed description of BCTs with examples Also - conducted at a family m…
Spurrier, N.J., Bell, L., Wilson, A., Lowe, E., Golley, R. & Magarey, A.A. 2016	Pilot (Pre-post)	MODERATE	Joanna Briggs Institute Critical Appraisal - Checklist for Quasi-Experimental Studies (non-randomized experimental studies)	Limitations Small sample non randomised controlled pilot study Self-reporting methods could have led to measurement and social desirability bias Intervention may have had limited success as ecological theory regarding obesity development suggests that macro-environments exert greater influence on obesity development/maintenance than parent’s ability to optimise the family home environment	STRONG	(i) Clear desciption of parent involvement (ii) Focuses on context and based on theory (i.e. sought to change the home environment) (iii) Detailed description of BCTs with examples
Watson, P.M., Dugdill, L., Pickering, K., Owen, S., Hargreaves, J., Staniford, L.J., Murphy, R.C., Knowles, Z. & Cable, N.T. 2015	Quasi-experimental (Single group, repeated measures with qualitative questionnaires)	MODERATE	Joanna Briggs Institute Critical Appraisal - Checklist for Quasi-Experimental Studies (non-randomized experimental studies)	Strengths Ecologically valid data from a childhood obesity treatment intervention as it was delivered in practice. The first article to use the Template for Intervention Description and Replication (TIDieR) checklist to describe a childhood obesity treatment intervention Limitations Lack of control group and a high attrition rate (48%) The pre–post design provides no information about how childre…	STRONG	(i) Clear desciption of parent involvement (ii) Discusses theoretical underpinnings. Incorporates qualitative information on diet and PA behaviours (iii) Included a list of "Most frequently used behaviour change techniques (BCTs) at GOALS and examples of their application. Figures refer to the corresponding number on Michie et al.’s (2011) CALO-RE taxonomy".
**Wong, E.M. & Cheng, M.M. 2013	Quasi-experimental (Multiple group, repeated measures)	MODERATE	Joanna Briggs Institute Critical Appraisal - Checklist for Quasi-Experimental Studies (non-randomized experimental studies)	Strengths Self‐report energy expenditure tools generally exhibit good test–retest reliability but moderate validity in young children (Kohl et al. 2000), so the exercise log was used for seven consecutive days to achieve greater reliability in recording PA and energy consumption. Limitations No follow up period	MODERATE/ STRONG	(i) Designed with parental influence in mind - i.e. parent telephone calls but did not fit one of the three categories of parental involvement (ii) Theory-based, on Stages of Change (though doesn't explain Theory of Change model or refer to it in discussion) and Motivational interviewing. Discussed cultural mechanisms/ influences and psychological factors (iii) Detailed description of BCTs with e…
Arauz Boudreau, A.D., Kurowski, D. S., Gonzalez, W. I., Dimond, M. A. & Oreskovic, N. M. 2013	Pilot (RCT)	1. Selection bias Random sequence generation: Low Allocation concealment: Unclear 2. Performance bias Blinding of participants and personnel: High 3. Detection bias Blinding of outcome assessment: Unlcear 4. Attrition bias Incomplete outcome data: High 5. Reporting bias Selective reporting: Low 6. Other bias: Unclear	Cochrane Risk of Bias tool	Limitations Pilot Small sample size and high attrition so a lack of statistical power and inablity to show that combining child and parent interactive education with health coaching might provide benefits over routine medical care. Although participants were randomised, the waitlist study design meant neither participants or study team were blinded to group allocation.	MODERATE	(i) Categorised as promoting parental support (ii) No theory mentioned. Good discussion on barriers to engagement and program completion and acknowledges the individual nature of the complex factors contributing to child obesity. Emhasises "familismo" and cultural sensitivity. Measured HRQoL. (iii) Strong on BCTs with a focus on 'culturally sensiive' coaching (accountabilty and empowerment) and s…
Brennan, L., Walkley, J., Lukeis, S., Risteska, A., Archer, L., Digre, E., Fraser, S. & Greenway, K. 2009	4x case studies (from an RCT)	STRONG	Joanna Briggs Institute Critical Appraisal - Checklist for Case Reports	Strengths Treatmemt delivered by a range of clinicians supports the robustness of results Use of a theory driven, evidence-based, developmentally appropriate, manualised intervention approach also adds strength Positive outcomes achieved despite limited training and experience of the clinicians, demonstrating the robustness of the program Use of comprehensive outcome assessments using best availa…	MODERATE	(i) Categorised as promoting parental support (ii) Provided little commentary on mechanisms (iii) The use of a series of case studies allowed for in-depth exploration of objective outcomes, subjective goals and behaviour change strategies.
Cason-Wilkerson, R., Goldberg, S., Albright, K., Allison, M. &Haemer, M. 2015 Not included in quantitative synthesis	Qualitative (6x focus groups)	STRONG	Joanna Briggs Institute Critical Appraisal - Checklist for Qualitative Research	Strengths Focus on the perspectives of low-income minority participants, who are at high risk of obesity and its complications, but in interventions are less well studied. Rigorous qualitative methodology with two coders coding 100% of focus group transcripts, in addition to consensus coding with a qualitative expert to ensure appropriateness of all analysis Limitations Inherent subjectivity of t…	MODERATE	(i) Strong discussion of parents involvement in intervention (promoting parent support) (ii) Barriers and facilitators to implementing diet and PA behaviours and overcoming barriers The focus on treatment-seeking population added to the understanding of motivational factors that can facilitate healthy changes, types of behavior change strategies, and treatment goals that were well received. Also …
**Davis, A.M., Daldalian, M.C., Mayfield, C.A., Dean, K., Black, W.R., Sampilo, M.L., Gonzalez-Mijares, M. & Suminski, R. 2013	Quasi-experimental (Single group, pre-post)	MODERATE	Joanna Briggs Institute Critical Appraisal - Checklist for Quasi-Experimental Studies (non-randomized experimental studies)	Strengths A highly ethnically/racially diverse, low-income population, which previous research has suggested is disproportionately affected by pediatric obesity. Also considers age as a factor influencing outcomes. Limitations Clinical significance for the majority of participants remains elusive Intervention lacked a control group - though being a community-based clinical intervention, however, …	MEDIUM	(i) Insufficient detail to categorise parental involvement (ii) No discussion in relation to theory, but does suggest reasons for attrition (iii) Used small weekly incentives and problem-solving.
Davis, A.M., Sampilo, M., Gallagher, K.S., Landrum, Y. & Malone, B. 2013	RCT	1. Selection bias Random sequence generation: Low Allocation concealment: Unclear 2. Performance bias Blinding of participants and personnel: Unclear 3. Detection bias Blinding of outcome assessment: Unclear 4. Attrition bias Incomplete outcome data: Low 5. Reporting bias Selective reporting: High 6. Other bias: Unclear	Cochrane Risk of Bias tool	Strengths Reported on intervention feasibility and fidelity Limitations Small sample from several rural areas in only one state; therefore, findings may not generalize to rural areas in other states. Sample was predominantly Caucasian, but reflective of the population from which the sample was drawn and, therefore, expected. Used some non obesity-specific measures - such as the CBCL and the BPFA …	MODERATE	(i) Insufficient detail to categorise parental involvement (ii) No discussion of theory.However does take into account other psychological and behavioural measures (eg. mental state and feeding behaviour). (iii) No discussion of BCTs (education-based). Also - Non significant findings between intervention and physicisan visit (sugests equally as effective)
**Delamater, A.M., Pulgaron, E. R., Rarback, S., Hernandez, J., Carrillo, A., Christiansen, S. & Severson, H.H. 2013	Pilot (Quasi-experimental - single group pre-post)	WEAK	Joanna Briggs Institute Critical Appraisal - Checklist for Quasi-Experimental Studies (non-randomized experimental studies)	Limitations A pilot study and limited to a 1-month trial, so not clear whether children who continue to use the program would be able to maintain this rate of weight loss or if at some point they would revert to previous habits No control group Measurement relied on self-report of children, and statistical analyses did not control for type I error During program development, only 5 families parti…	MODERATE	(i) Categorised as promoting parental support (ii) Diet an PA behavioural outomes were assessed via an overall composite score for 'healthy lifestyle', based on 12 question items. Thorough reporting on program engagement, but minimal discussion on underlying mechanisms other than to acknowlege the program content was evidence-based. Theory-based psychological variable measures (Self Determiniatio…
**Epstein, L.H., Roemmich, J. N., Stein, R.I., Paluch, R.A. & Kilanowski, C.K. 2005 (studies 1 and 2)	Study 1- RCT Study 2 - Quasi-experimental (single group baseline-experiment-second baseline phase - with counterbalancing of 2nd and 3rd phases across participants)	Study 1: 1. Selection bias Random sequence generation: Low Allocation concealment: Unclear 2. Performance bias Blinding of participants and personnel: Unclear 3. Detection bias Blinding of outcome assessment: Unclear 4. Attrition bias Incomplete outcome data: Low 5. Reporting bias Selective reporting: Unclear 6. Other bias: Unclear" Study 2: WEAK	Study 1: Cochrane Risk of Bias tool Study 2: Joanna Briggs Institute Critical Appraisal - Checklist for Quasi-Experimental Studies (non-randomized experimental studies)	Strengths Study 1 an RCT Uses validated surveys Limitations Study 2: power is limited by small sample size	MODERATE/ STRONG	(i) Categorised as aiming to change both parent and child behaviour simultaneously (study 1) and promoting parental support (study 2) (ii) No theory mentioned, but discussed behavioural economic mechanisms re alternatives to eating. (iii) Good detail on BCTS focusing on praise and reinforcement systems for goal completion (material reward) Also - NULL intervention, but with an effective standard …
**Janicke, D.M. 2013	Case study (Evaluation of a RCT)	STRONG	Joanna Briggs Institute Critical Appraisal - Checklist for Case Reports	Strengths Illustrates the importance of flexibility in the application of a pediatric obesity intervention that can be translated to real world clinical practice Limitations Unable to be generalised but dicusses outcomes in relation to barriers and contextual factors	MODERATE	(i) Able to be categorised as aiming to change both parent and child behaviour simultaneously (ii) Discussed Social Ecological Theory and includes measures of self-esteem. Informative discussion on child barriers to attend treatment programs and emphasised parent-child teamwork as an effective strategy (support for joint ownership). (iii) Good detail on BCTS focusing on self-monitoring, goal sett…
Lee, A., Ho, M., Keung, V.M. & Kwong, A.C. 2014	Pilot (RCT)	1. Selection bias Random sequence generation: Low Allocation concealment: Unclear 2. Performance bias Blinding of participants and personnel: Low 3. Detection bias Blinding of outcome assessment: Unclear 4. Attrition bias Incomplete outcome data: High 5. Reporting bias Selective reporting: Unclear 6. Other bias: Low	Cochrane Risk of Bias tool	Strengths Contamination avoided by schools implementing series of school-based activities promoting healthy eating and active lifestyles throughout the project period under the broad HPS program approach enhancing the awareness of health lifestyle for all students. Reduced contamination effect for intervention group as they received the tailor-made weight management program as well as whole schoo…	MODERATE	(i) Able to be categorised as promoting parental support (ii) No discussion of theory or mechanisms. Intervention targeted self esteem, and assessed readiness to change, however lacked detail. (iii) Incorporated mulitple BCTS including goal setting, self monitoring, problem solving and motivational reinforcement/ rewards.
Reinehr, T., Schaefer, A., Winkel, K., Finne, E., Toschke, A.M. & Kolip, P. 2010	RCT	1. Selection bias Random sequence generation: Low Allocation concealment: Unclear 2. Performance bias Blinding of participants and personnel: High 3. Detection bias Blinding of outcome assessment: Unclear 4. Attrition bias Incomplete outcome data: Unclear 5. Reporting bias Selective reporting: Low 6. Other bias: Unclear	Cochrane Risk of Bias tool	Strengths Intervention was offered at two different treatment centres, which did not differ in the outcomes of their patients, supporting the generalisability of the intervention. Limitations Since PA training, behaviour counselling, and nutritional education were performed simultaneously in the intervention group, it is difficult to distinguish the impact of each of them on overweight reduction …	MEDIUM	(i) Insufficient detail to categorise parental involvement (ii) Some (limited) discussion re mediating effect of change of diet on reduction in weight. (iii) MInimal deail on BCTs - behaviour counselling Also - Focused on BMI and body composition/ markers of comoridity measures (skin fold, waist circumference, and blood pressure, bioelectrical impedance)
Robertson, W., Fleming, J. Kamal, A., Hamborg, T., Khan, K.A., Griffiths, F., Stewart-Brown, S.,Stallard, N., Petrou, S., Simkiss, D., Harrison, E., Kim, S.W. & Thorogood, M. 2017	RCT (multicentre)	1. Selection bias Random sequence generation: Low Allocation concealment: High 2. Performance bias Blinding of participants and personnel: Low 3. Detection bias Blinding of outcome assessment: Unclear 4. Attrition bias Incomplete outcome data: Unclear 5. Reporting bias Selective reporting: High 6. Other bias: Unclear	Cochrane Risk of Bias tool	Strengths Families could not be blinded to treatment allocation, but every effort was made to ensure that allocation remained unknown to researchers. All analyses were performed on an intention-to-treat basis Included process evaluation Limitations The pilot intervention was delivered by a small team of four experienced facilitators at one site, and so there may have been some reduction in facili…	MODERATE	(i) Able to categorised as promoting parent support (ii) Non theory-based and minimal discussion on mechanisms, though measured quality of parenting (iii) Lmkited detail on BCTs - focused on parenting skill development Also - null effects but with hypothesised explanations
Semke, C.A. 2012 (Dissertation)	Case study (Multiple baseline n=4)	WEAK	Joanna Briggs Institute Critical Appraisal - Checklist for Case Series	Strengths Multiple baseline design controls for threats to internal validity such as the effects of maturation or history. A multiple baseline approach is the most intensive and rigorous experimental design in single-subject research and has been found to be a highly reliable and valid research design (Kazdin, 1982). Addressed a gap in the literature by collecting information on the intervention …	MEDIUM	(i) Able to be categorised as promoting parent support (ii) No theory discussed in relation to BCTS, mechanisms or outcomes, except to mention that each individualised plan was based on principles of operant conditioning. Mentioned in introduction that Ecological Systems Theory, Behavioral Theory, and Social Cognitive Theory are interrelated and seminal in designing treatments for changing behavi…
**Teder, M., Morelius, E., Nordwall, M., Bolme, P., Ekberg, J., Wilhelm, E. & Timpka, T. 2013	Quasi-experimental (Single-group, pre-post - longitudunal 2y)	MODERATE	Joanna Briggs Institute Critical Appraisal - Checklist for Quasi-Experimental Studies (non-randomized experimental studies)	Strengths Long-term follow-up period (12m after 12m) and the low non-participation rate. Limitations Single-group design meant it was not possible to distinguish between FBIP effects and normal cognitive and behavioural maturation and development in childhood. Within-intervention assessments of lifestyle behaviours among children were pertinent also when interpreting the study results. The constr…	MODERATE	(i) Strong focus on parental influence, able to be categorised as promoting parent support (ii) Did not explain 'cognitive and behavioural components' Recognised the need for understanding mechanisms and discrepancies between child and parent reporting of the same behaviours in the child. (iii) Limited detail on BCTs - generally cover experiential activties (i.e. provided a light meal), and focus…
West, F., Sanders, M.R., Cleghorn, G.J. & Davies, P.S. 2010	RCT (Waitlist control)	1. Selection bias Random sequence generation: Low Allocation concealment: High 2. Performance bias Blinding of participants and personnel: High 3. Detection bias Blinding of outcome assessment: High 4. Attrition bias Incomplete outcome data: High 5. Reporting bias Selective reporting: Low 6. Other bias: High	Cochrane Risk of Bias tool	Strengths Main strength is thorough evaluation of the clinical importance of intervention outcomes by calculating effect sizes and reliable change indices, and performing normative comparisons Included measures of parenting and protocol adherence, and involved a one-year follow-up. To provide realistic estimates of intervention efficacy, intention-to-treat procedures were used and effect sizes fo…	MODERATE	(i) Able to be categorised as parents as exclusive agents for change. (ii) Measured 'problem behaviours' related to eating and PA without detail on those behaviours (i.e. an overall score). Acknowledged the influence of parenting style and parent self-efficacy in mediating obesity outcomes (BMI). No discussion of mediators or theory (iii) Good description of BCTs with exaMples including; targetin…
Wright, J., Phillips, B., Watson, B., Newby, P., Norman, G. & Adams, W. 2013	Pilot (RCT waitlist control)	1. Selection bias Random sequence generation: Unclear Allocation concealment: Low 2. Performance bias Blinding of participants and personnel: Unclear 3. Detection bias Blinding of outcome assessment: Unclear 4. Attrition bias Incomplete outcome data: Unclear 5. Reporting bias Selective reporting: Unclear 6. Other bias: Unclear	Cochrane Risk of Bias tool	Limitations Limited statistical power (i.e., small sample size) and non-equivalent study arms following randomization - a larger sample size may have detected more between group differences.	MODERATE/ STRONG	(i) Focus on influential role of parents and integrated with primary care. Categorised as aimed to change both parent and child behaviour simultaneously. (ii) Includes principles from psychological model and theory, though does not discuss in detail. Minimal detail on behavioural outcomes. (iii) BCTs covered well; goal setting, contracting, problem solving, self-monitoring (weight, diet and TCT t…
Chaiopanont, S. 2016	Quasi-experimental (Cross sectional, comparison group matched from another primary school)	MODERATE	Joanna Briggs Institute Critical Appraisal - Checklist for Analytical Cross Sectional Studies	Limitations xx	WEAK	(i) Parents only acknowledged as influential (measured parent behaviour) (ii) Limited discussion of specific diet and PA behavioural outomes (iii) Limited discussion of causual mechanisms beyond parental characterisics and support Also - Report is not fully coherent in English and omitted details on outcome measures
Cohen, T.R., Hazell, T. J., Vanstone, C.A., Rod d, C. & Weiler, H.A. 2018	RCT (3 experimental arms)	1. Selection bias Random sequence generation: Low Allocation concealment: Unclear 2. Performance bias Blinding of participants and personnel: Unclear 3. Detection bias Blinding of outcome assessment: Unclear 4. Attrition bias Incomplete outcome data: High 5. Reporting bias Selective reporting: High 6. Other bias: Unclear	Cochrane Risk of Bias tool	Strengths Study used the CEBQ to capture changes in eating behaviors over the course of a year, an outcome not been previously reported - The subjectivity of the CEBQ offers advantages: Completed by caregivers and provides a global understanding to underlying behavioral issues that the child may experience. Compared to other dietary assessments methods, the CEBQ allows for reflection of different…	WEAK	(i) Parents only acknowledged as influential (ii) No theory disccused (iii) No causal mechanism discussed Also - focus is on eating behaviours and associations with leptin. PA is not discussed at all in Discussion section and was not a significant result in the study
Davis, A.M., Sampilo, M., Gallagher, K.S., Dean, K., Saroja, M.B., Yu, Q., He, J. & Sporn, N. 2016	Pilot (cRCT)	1. Selection bias Random sequence generation: Low Allocation concealment: Unclear 2. Performance bias Blinding of participants and personnel: Unclear 3. Detection bias Blinding of outcome assessment: Low 4. Attrition bias Incomplete outcome data: Low 5. Reporting bias Selective reporting: Low 6. Other bias: Unclear	Cochrane Risk of Bias tool	Limitations Small sample Participants all from rural areas in only one state, so findings may not generalize to rural areas in other states Sample was predominantly Caucasian (expected) Some of measures (CBCL, BPFAS) were not obesity specific	WEAK/ MODERATE	(i) Parents only acknowledged as influential (measured parent behaviour) (ii) No theory disccused (iii) No causal mechanism discussed Also - interesting discussion regarding rural populations. Non significant findings (though positive changes did occur via both modalities, particularly for psychological variables)
Elizondo-Montemayor, L., Gutierrez, N., Moreno, D., Martinez, U., Tamargo, D. & Trevino, M. 2013	Quasi-experimental (Cross sectional)	MODERATE	Joanna Briggs Institute Critical Appraisal - Checklist for Analytical Cross Sectional Studies	Strengths Comprehensive approach that targeted energy balance rather than only nutritional quality, individualised nutritional assessment and dietetic planning for each child, frequent periodicity of visits, school-site, parental involvement, school-year duration, the same team of RD and physician, and the high degree of fidelity with which the intervention was delivered Limitations Voluntary par…	WEAK	(i) Parents only acknowledged as influential (ii) No theory disccused (iii) No causal mechanism discussed Also - focused on the metabolic syndrome and its components . Inclusion criteria included a 12h overnight fast.
Guo, H., Zeng, X., Zhuang, Q. Zheng, Y. & Chen, S. 2015	RCT	1. Selection bias Random sequence generation: Unclear Allocation concealment: Unclear 2. Performance bias Blinding of participants and personnel: Unclear 3. Detection bias Blinding of outcome assessment: Unclear 4. Attrition bias Incomplete outcome data: High 5. Reporting bias Selective reporting: Low 6. Other bias: Unclear	Cochrane Risk of Bias tool	Limitations School-based, which could not control students’ diet and exercise behaviour out of school. Non convenient location for some families Small sample and short period of intervention	WEAK	(i) Parents only acknowledged as influential (ii) Little detail on intervention strategies, diet and PA behavioural measures or outcomes. Mentioned Social Cognitive Theory, but no discussion of how it was used in the intervention (iii) No causal mechanism discussed
Joosse, L., Stearns, M., Anderson, H., Hartlaub, P. & Euclide, J. 2008	Quasi-experimental (Single group pre-post)	WEAK	Joanna Briggs Institute Critical Appraisal - Checklist for Quasi-Experimental Studies (non-randomized experimental studies)	Limitations No control group (cannot know if non-program effects were present, such as environmental influences) Reliance on self-recording of behavior as measures (participants relayed their perception that such recording was tedious, and therefore it is possible that not all behavior was diligently reported. Also parents’ estimates of their children’s increases in PA were substantially greater …	WEAK	(i) Parents only acknowledged as influential (ii) No theory disccused (iii) No causal mechanism discussed
**Nemet, D., Barkan, S., Epstein, Y., Friedland, O., Kowen, G. & Eliakim, A. 2005	RCT	1. Selection bias Random sequence generation: Unclear Allocation concealment: Unclear 2. Performance bias Blinding of participants and personnel: High 3. Detection bias Blinding of outcome assessment: High 4. Attrition bias Incomplete outcome data: High 5. Reporting bias Selective reporting: Low 6. Other bias: Unclear	Cochrane Risk of Bias tool	Limitations Possible that the subjectivity of the food-recording techniques was a source of error Compared against a no treatment rather than a standard weight management program	WEAK	(i) Parents only acknowledged as influential (ii) No theory disccused (iii) No causal mechanism discussed Also - little detail on behavioural measures. Study more focused on anthrometric measurements and lipid levels.
Schwartz, R.P., Vitolins, M.Z. Case, L.D., Armstrong, S.C., Perrin, E.M., Cialone, J. & Bell, R A. 2012	Pilot (Quasi-experimental - single group pre-post)	WEAK	Joanna Briggs Institute Critical Appraisal - Checklist for Quasi-Experimental Studies (non-randomized experimental studies)	Limitations Small number of participants and a 29% dropout rate Feasibility study so no control Nutritional changes were self-reported and may have been subject to recall bias	WEAK/ MODERATE	(i) Able to categorised as promoting parent support of the child's behaviour change (ii) No theory disccused (iii) No causal mechanism discussed
van Middelkoop, M., Ligthart, K.A.M., Paulis, W.D., van Teeffelen, J., Kornelisse, K. & Koes, B.W. 2017	Quasi-experimental (cohort study, pre-post, wait list control)	MODERATE	Joanna Briggs Institute Critical Appraisal - Checklist for Quasi-Experimental Studies (non-randomized experimental studies)	Strengths An existing program so made use of the natural waiting list period and added a baseline measurement at registration so children formed their own controls. This allowed the authors to study purely the intervention effect. 56% of the deprived population was compliant to the intervention and the loss to follow-up was low restricted to 25% at 52 weeks Limitations Self reporting bias and lac…	WEAK	(i) Parents only acknowledged as influential (ii) No theory disccused (iii) No causal mechanism discussed Also - null results
Williams, D. 2012 (Dissertation)	Quasi-experimental (2-arm, pre-post, 2yr observation)	WEAK	Joanna Briggs Institute Critical Appraisal - Checklist for Quasi-Experimental Studies (non-randomized experimental studies)	Limitations The program used had both individual and group components however, the sample size in the individual group was too small to determine any differences between group or individual weight management programs. Dietary intake, activity, and behavior habits were self-reported, which may not fully reflect actual intake and activity levels. Participants were from a limited geographic area (on…	WEAK	(i) Parents only acknowledged as influential (ii) No theory disccused (iii) No causal mechanism discussed Also - based on probablities of adhering to nutrition and PA guidelines.Groups were divided on basis of program compliance but reasons why a participant did or did not complete the program were not well understood
*Secondary appraisal by M A-F

## Sheet: Table S1b Cochrane risk of bias
**Appraised by MAF as a second rater (n=4/18 interventions) 22%
Cochrane Risk of Bias Tool
Epstein et al, 1994
Bias domain	Source of bias	Authors' judgement (low, unclear, high risk of bias)	Guidance: Support for judgment	Support for judgement	Guidance: Review authors’ judgment (assess as low, unclear or high risk of bias)
1. Selection bias	Random sequence generation	Unclear	Describe the method used to generate the allocation sequence in sufficient detail to allow an assessment of whether it should produce comparable groups	Insufficient information	Selection bias (biased allocation to interventions) due to inadequate generation of a randomised sequence
	Allocation concealment	Unclear	Describe the method used to conceal the allocation sequence in sufficient detail to determine whether intervention allocations could have been foreseen before or during enrolment	Insufficient information	Selection bias (biased allocation to interventions) due to inadequate concealment of allocations before assignment
2. Performance bias	Blinding of participants and personnel*	Unclear	Describe all measures used, if any, to blind trial participants and researchers from knowledge of which intervention a participant received. Provide any information relating to whether the intended blinding was effective	Insufficient information	Performance bias due to knowledge of the allocated interventions by participants and personnel during the study
3. Detection bias	Blinding of outcome assessment*	Unclear	Describe all measures used, if any, to blind outcome assessment from knowledge of which intervention a participant received. Provide any information relating to whether the intended blinding was effective	Insufficient information	Detection bias due to knowledge of the allocated interventions by outcome assessment
4. Attrition bias	Incomplete outcome data*	Unclear	Describe the completeness of outcome data for each main outcome, including attrition and exclusions from the analysis. State whether attrition and exclusions were reported, the numbers in each intervention group (compared with total randomised participants), reasons for attrition or exclusions where reported, and any reinclusions in analyses for the review	n=44 (low precision) but no info on attrition. Resported adherence data (completeness of recording) were analyzed. E.g. Completeness of recording indicated the number of days that enough information was available on eating or activity to calculate the number of RED foods consumed and caloric intake/expenditure. Habit books were available for 38 of the 39 children. However, based on completeness o…	Attrition bias due to amount, nature, or handling of incomplete outcome data
5. Reporting bias	Selective reporting	Unclear	State how selective outcome reporting was examined and what was found	Subjective reporting - mastery was assessed in treatment based on self-report. Some participants may have inaccurately reported mastery of a skill and moved to a new skill before the prior behavior was changed	Reporting bias due to selective outcome reporting
6. Other bias	External validity (generalisability applicability)	Unclear	State any important concerns about bias not covered in the other domains in the tool	Low generalisability - The yoked design of the study controlled for the pacing of the information and the rate of reinforcement presentation. However, the design did not permit identifying the relative contribution of mastery criteria or contingent reinforcement for mastery	Bias due to problems not covered elsewhere
*Assessments should be made for each main outcome or class of outcomes.
Cochrane Risk of Bias Tool
Epstein et al, 2004
Bias domain	Source of bias	Authors' judgement (low, unclear, high risk of bias)	Guidance: Support for judgment	Support for judgement	Guidance: Review authors’ judgment (assess as low, unclear or high risk of bias)
1. Selection bias	Random sequence generation	Unlcear	Describe the method used to generate the allocation sequence in sufficient detail to allow an assessment of whether it should produce comparable groups	128 families were screened in two cohorts, starting 16 months apart. 72 families met the criteria: child over 85th BMI percentile, one parent willing to attend treatment meetings, no family members participating in another weight control program, no child or parent with current psychiatric problems or dietary or exercise restrictions, and child able to read the manuals and complete the self-monit…	Selection bias (biased allocation to interventions) due to inadequate generation of a randomised sequence
	Allocation concealment	Unlcear	Describe the method used to conceal the allocation sequence in sufficient detail to determine whether intervention allocations could have been foreseen before or during enrolment	Insufficient information	Selection bias (biased allocation to interventions) due to inadequate concealment of allocations before assignment
2. Performance bias	Blinding of participants and personnel*	Unlcear	Describe all measures used, if any, to blind trial participants and researchers from knowledge of which intervention a participant received. Provide any information relating to whether the intended blinding was effective	Families were not aware of the group they were randomized to prior to dropping out. No other mention of blinding.	Performance bias due to knowledge of the allocated interventions by participants and personnel during the study
3. Detection bias	Blinding of outcome assessment*	Unlcear	Describe all measures used, if any, to blind outcome assessment from knowledge of which intervention a participant received. Provide any information relating to whether the intended blinding was effective	Insufficient information	Detection bias due to knowledge of the allocated interventions by outcome assessment
4. Attrition bias	Incomplete outcome data*	Low	Describe the completeness of outcome data for each main outcome, including attrition and exclusions from the analysis. State whether attrition and exclusions were reported, the numbers in each intervention group (compared with total randomised participants), reasons for attrition or exclusions where reported, and any reinclusions in analyses for the review	n=62 (low precision) Majority of height/ weight data measured in the lab, but self-reported heights and weights used when families were unable to attend assessments. Underestimation of weight and height was adjusted for self-report based on a data set of more than 1,000 cases in which adult and child heights and weights were self-reported and then measured. For children, none of the heights and w…	Attrition bias due to amount, nature, or handling of incomplete outcome data
5. Reporting bias	Selective reporting	Unclear	State how selective outcome reporting was examined and what was found	Dichotomous measure instead of a continuous variable may have resulted in a loss of some power in determining relationships between variables, but the classification of participants as substituters (n=26) or complementers (n=32) provided an individual-difference variable consistent with the theory and the asymmetrical nature of the relationship between sedentary behaviors and PA or dietary intake…	Reporting bias due to selective outcome reporting
6. Other bias	External validity (generalisability applicability)	Unclear	State any important concerns about bias not covered in the other domains in the tool		Bias due to problems not covered elsewhere
*Assessments should be made for each main outcome or class of outcomes.
Cochrane Risk of Bias Tool
**Fisher et al, 2018 Study 2 "HIKCUPS" (Original RCT)
Bias domain	Source of bias	Authors' judgement (low, unclear, high risk of bias)	Guidance: Support for judgment	Support for judgement	Guidance: Review authors’ judgment (assess as low, unclear or high risk of bias)
1. Selection bias	Random sequence generation	Low	Describe the method used to generate the allocation sequence in sufficient detail to allow an assessment of whether it should produce comparable groups	Participants were parents and children taking part in one of two trials incorporating goal setting - therefore naturally randomised or already randomiesed by the studies. No info on randomisation within the studies. (i.e. study 2 which was 3-arm). However the groups were not similar - study 1 was parents of preschool age children, and study 2 was parents of children aged 5-9y There was also a dif…	Selection bias (biased allocation to interventions) due to inadequate generation of a randomised sequence
	Allocation concealment	Low	Describe the method used to conceal the allocation sequence in sufficient detail to determine whether intervention allocations could have been foreseen before or during enrolment	Insufficient information	Selection bias (biased allocation to interventions) due to inadequate concealment of allocations before assignment
2. Performance bias	Blinding of participants and personnel*	Unclear	Describe all measures used, if any, to blind trial participants and researchers from knowledge of which intervention a participant received. Provide any information relating to whether the intended blinding was effective	Insufficient information	Performance bias due to knowledge of the allocated interventions by participants and personnel during the study
3. Detection bias	Blinding of outcome assessment*	(GE - Unclear) MAF - HIGH	Describe all measures used, if any, to blind outcome assessment from knowledge of which intervention a participant received. Provide any information relating to whether the intended blinding was effective	Insufficient information	Detection bias due to knowledge of the allocated interventions by outcome assessment
4. Attrition bias	Incomplete outcome data*	Low	Describe the completeness of outcome data for each main outcome, including attrition and exclusions from the analysis. State whether attrition and exclusions were reported, the numbers in each intervention group (compared with total randomised participants), reasons for attrition or exclusions where reported, and any reinclusions in analyses for the review	Data coded according to SMART princples - second rater coded 10% of goals and good to excellent intraclass correlations were achieved for total scores. Children's diet behaviour was self-reported by parents via a validated 137-item Food Frequency Questionnaire (subjective) - not valdated in study 1. Questions were also designed for the study. Children’s activity was measured over 8 days using the…	Attrition bias due to amount, nature, or handling of incomplete outcome data
5. Reporting bias	Selective reporting	(GE - Unclear) MAF - LOW	State how selective outcome reporting was examined and what was found	Compared study 1 (parents of preschool) and study 2 (paremts of children aged 5-9y). Ease by which parents set goals for their children may have differed on the basis of their age and may have been a factor in the differences in goal-scores. There was also a difference in the duration of the two studies (10 weeks and 6 months), although both were an appropriate length to detect behavior change Th…	Reporting bias due to selective outcome reporting
6. Other bias	External validity (generalisability applicability)	Unclear	State any important concerns about bias not covered in the other domains in the tool		Bias due to problems not covered elsewhere
*Assessments should be made for each main outcome or class of outcomes.
Cochrane Risk of Bias Tool
Golan et al, 1998
Bias domain	Source of bias	Authors' judgement (low, unclear, high risk of bias)	Guidance: Support for judgment	Support for judgement	Guidance: Review authors’ judgment (assess as low, unclear or high risk of bias)
1. Selection bias	Random sequence generation	Unclear	Describe the method used to generate the allocation sequence in sufficient detail to allow an assessment of whether it should produce comparable groups	60 obese children aged 6-11y from the public school system of middle-class town of Rehovot (population 100 000) in central Israel. The two groups were matched for gender and age. 160 grade school children were identified as being obese: 140 met inclusion criteria and 60 agreed to participate, most of whom were of middle class.The parents had to agree to attend group sessions, to complete question…	Selection bias (biased allocation to interventions) due to inadequate generation of a randomised sequence
	Allocation concealment	Unclear	Describe the method used to conceal the allocation sequence in sufficient detail to determine whether intervention allocations could have been foreseen before or during enrolment	Inadequate information given	Selection bias (biased allocation to interventions) due to inadequate concealment of allocations before assignment
2. Performance bias	Blinding of participants and personnel*	Unclear	Describe all measures used, if any, to blind trial participants and researchers from knowledge of which intervention a participant received. Provide any information relating to whether the intended blinding was effective	In the experimental condition weight and height measurement of all family members were taken to emphasise the growth of all the siblings, who were told their parents were involved in a health promotion course. Inadequate information given	Performance bias due to knowledge of the allocated interventions by participants and personnel during the study
3. Detection bias	Blinding of outcome assessment*	Unclear	Describe all measures used, if any, to blind outcome assessment from knowledge of which intervention a participant received. Provide any information relating to whether the intended blinding was effective	Inadequate information given	Detection bias due to knowledge of the allocated interventions by outcome assessment
4. Attrition bias	Incomplete outcome data*	High	Describe the completeness of outcome data for each main outcome, including attrition and exclusions from the analysis. State whether attrition and exclusions were reported, the numbers in each intervention group (compared with total randomised participants), reasons for attrition or exclusions where reported, and any reinclusions in analyses for the review	All parents completed the Social Demographic Questionnaire and the Family Eating and Activity Habits Questionnaire, which was developed especially for this study. The content validity (completeness of criteria, clarity and suitability of scoring) was evaluated by a team of ten experts in epidemiology, pediatric medicine, internal medicine, health education, nutrition, psychology and sociology. Al…	Attrition bias due to amount, nature, or handling of incomplete outcome data
5. Reporting bias	Selective reporting	Low	State how selective outcome reporting was examined and what was found	Full comparisons of all outcome measures bwtween the two groups, Overall, the contribution of the different behavioural changes to the overweight reduction was similar in both groups. The main contribution was made by the elimination of eating between meals and eating while doing another activity. Concluded that treatment of childhood obesity with the parents as the exclusive agents of change ind…	Reporting bias due to selective outcome reporting
6. Other bias	External validity (generalisability applicability)	Unclear	State any important concerns about bias not covered in the other domains in the tool	n=60 (low precision)	Bias due to problems not covered elsewhere
*Assessments should be made for each main outcome or class of outcomes.
Cochrane Risk of Bias Tool
**Maddison et al, 2014 "Switch" (Screen-Time Weight-loss Intervention Targeting Children at Home)
Bias domain	Source of bias	Authors' judgement (low, unclear, high risk of bias)	Guidance: Support for judgment	Support for judgement	Guidance: Review authors’ judgment (assess as low, unclear or high risk of bias)
1. Selection bias	Random sequence generation	Low	Describe the method used to generate the allocation sequence in sufficient detail to allow an assessment of whether it should produce comparable groups	Children aged 9-12y and their primary caregiver living in Auckland, New Zealand were recruited via schools, community centres, and word of mouth. All used electronic media (television, video games, computer) for at least 15 hours per week. Participants were asked to self-select the single ethnic group they most identified with. In New Zealand the majority of Māori and Pacific live in the greater …	Selection bias (biased allocation to interventions) due to inadequate generation of a randomised sequence
	Allocation concealment	(GE High) MAF - LOW	Describe the method used to conceal the allocation sequence in sufficient detail to determine whether intervention allocations could have been foreseen before or during enrolment	Allocation concealment was maintained up to the point of randomisation.	Selection bias (biased allocation to interventions) due to inadequate concealment of allocations before assignment
2. Performance bias	Blinding of participants and personnel*	High	Describe all measures used, if any, to blind trial participants and researchers from knowledge of which intervention a participant received. Provide any information relating to whether the intended blinding was effective	Blinding of participants and research assistants was not possible due to the nature of the intervention. At the end of the study follow-up, the control group were offered the intervention components.	Performance bias due to knowledge of the allocated interventions by participants and personnel during the study
3. Detection bias	Blinding of outcome assessment*	GE HIGH (MAF - Unclear)	Describe all measures used, if any, to blind outcome assessment from knowledge of which intervention a participant received. Provide any information relating to whether the intended blinding was effective	Blinding of participants and research assistants was not possible due to the nature of the intervention.	Detection bias due to knowledge of the allocated interventions by outcome assessment
4. Attrition bias	Incomplete outcome data*	(GE Unclear) MAF - LOW	Describe the completeness of outcome data for each main outcome, including attrition and exclusions from the analysis. State whether attrition and exclusions were reported, the numbers in each intervention group (compared with total randomised participants), reasons for attrition or exclusions where reported, and any reinclusions in analyses for the review	Self-reported measures of sedentary behaviour, physical activity, diet, and enjoyment of sedentary behaviour and physical activity measured at baseline (via valiadated surveys). All measures repeated at 24 weeks. But sensitivity to assess change is unclear Treatment evaluations were performed on the principle of intention to treat (ITT), using data collected from all randomised participants. A mu…	Attrition bias due to amount, nature, or handling of incomplete outcome data
5. Reporting bias	Selective reporting	Low	State how selective outcome reporting was examined and what was found	A sensitivity analysis was conducted to determine the effect of the intervention on after school sedentary (screen and non-screen) time and physical activity levels. Same regression analyses were conducted examining use-of-time data for weekdays between 15:00 and 18:00 hours as well as weekends; but no significant differences were observed.	Reporting bias due to selective outcome reporting
6. Other bias	External validity (generalisability applicability)	GE HIGH (MAF - Low)	State any important concerns about bias not covered in the other domains in the tool	n=251 and 12m follow-up (good precision) Null findings across the board, but consistent trend effects for most of the self-reported measures, including decreases in total sedentary time, screen-based sedentary time, and total energy intake, and increased MVPA. Taken together, the authors suggested the intervention was not intensive enough to manipulate these behaviours and positively impact on bo…	Bias due to problems not covered elsewhere
*Assessments should be made for each main outcome or class of outcomes.
Cochrane Risk of Bias Tool
Yusop et al, 2018
Bias domain	Source of bias	Authors' judgement (low, unclear, high risk of bias)	Guidance: Support for judgment	Support for judgement	Guidance: Review authors’ judgment (assess as low, unclear or high risk of bias)
1. Selection bias	Random sequence generation	Low	Describe the method used to generate the allocation sequence in sufficient detail to allow an assessment of whether it should produce comparable groups	Out of 284 obese children aged 7–11 years old from five primary schools in three districts of Selangor, 50 children were recruited into the study. Obesity was defined as a BMI-for-age z score greater than + 2 SD Parents/caregivers who expressed an interest in participating in the study were scheduled for a recruitment appointment Participants were age matched and randomized using a permuted block…	Selection bias (biased allocation to interventions) due to inadequate generation of a randomised sequence
	Allocation concealment	Low	Describe the method used to conceal the allocation sequence in sufficient detail to determine whether intervention allocations could have been foreseen before or during enrolment	To guarantee allocation concealment, authors had the randomization carried out by an independent third party	Selection bias (biased allocation to interventions) due to inadequate concealment of allocations before assignment
2. Performance bias	Blinding of participants and personnel*	Unlcear	Describe all measures used, if any, to blind trial participants and researchers from knowledge of which intervention a participant received. Provide any information relating to whether the intended blinding was effective	Inadequate information given	Performance bias due to knowledge of the allocated interventions by participants and personnel during the study
3. Detection bias	Blinding of outcome assessment*	Unlcear	Describe all measures used, if any, to blind outcome assessment from knowledge of which intervention a participant received. Provide any information relating to whether the intended blinding was effective	Inadequate information given	Detection bias due to knowledge of the allocated interventions by outcome assessment
4. Attrition bias	Incomplete outcome data*	High	Describe the completeness of outcome data for each main outcome, including attrition and exclusions from the analysis. State whether attrition and exclusions were reported, the numbers in each intervention group (compared with total randomised participants), reasons for attrition or exclusions where reported, and any reinclusions in analyses for the review	Use of self reported physical activity questionnaire and a three-day food record was subjected to under-reporting (~ 50%), despite the use of various measures to minimize its occurrence. As with dietary reporting, the use of self-reported PA may produce bias, particularly relating to social desirability - even though proceduers were taken to interview partivipants at every visit to assure the com…	Attrition bias due to amount, nature, or handling of incomplete outcome data
5. Reporting bias	Selective reporting	High	State how selective outcome reporting was examined and what was found	SIGNIFICANT BETWEEN GROUPS EFFECTS (PA) (i) IG significantly increased PA level from low to moderate (p < 0.01). CG PA score remained low at the end of the intervention with no significant mean change (p < 0.05). The mean change difference in PA score between groups was statistically significant (p < 0.05). SIGNIFICANT WITHIN GROUPS EFFECTS (DIET) (i) Energy, carbohydrate (g) and sugar (g) intake…	Reporting bias due to selective outcome reporting
6. Other bias	External validity (generalisability applicability)	Unlcear	State any important concerns about bias not covered in the other domains in the tool	n=50 - Power calculations required a sample size required 15 children per group to ensure a minimum predictive power of 80% with a 0.05 probability of type I error, assuming a 30% drop-out rate.	Bias due to problems not covered elsewhere
*Assessments should be made for each main outcome or class of outcomes.
Cochrane Risk of Bias Tool
Arauz Boudreau et al, 2013 "Healthy Living Today!"
Bias domain	Source of bias	Authors' judgement (low, unclear, high risk of bias)	Guidance: Support for judgment	Support for judgement	Guidance: Review authors’ judgment (assess as low, unclear or high risk of bias)
1. Selection bias	Random sequence generation	Low	Describe the method used to generate the allocation sequence in sufficient detail to allow an assessment of whether it should produce comparable groups	Forty-one Latino children with BMI _85%, aged 9–12 years, and their caregivers were recruited from one urban community health centre located in a predominantly low-income community. Participating dyads were sequentially randomized to the intervention or control group in a 3:2 ratio during the fırst half of the study, and then 2:2 during the second half of the study to adequately fıll the group cl…	Selection bias (biased allocation to interventions) due to inadequate generation of a randomised sequence
	Allocation concealment	Unclear	Describe the method used to conceal the allocation sequence in sufficient detail to determine whether intervention allocations could have been foreseen before or during enrolment	Inadequate information given	Selection bias (biased allocation to interventions) due to inadequate concealment of allocations before assignment
2. Performance bias	Blinding of participants and personnel*	High	Describe all measures used, if any, to blind trial participants and researchers from knowledge of which intervention a participant received. Provide any information relating to whether the intended blinding was effective	Although participants were randomised, the waitlist study design meant neither participants or study team were blinded to group allocation.	Performance bias due to knowledge of the allocated interventions by participants and personnel during the study
3. Detection bias	Blinding of outcome assessment*	Unclear	Describe all measures used, if any, to blind outcome assessment from knowledge of which intervention a participant received. Provide any information relating to whether the intended blinding was effective		Detection bias due to knowledge of the allocated interventions by outcome assessment
4. Attrition bias	Incomplete outcome data*	High	Describe the completeness of outcome data for each main outcome, including attrition and exclusions from the analysis. State whether attrition and exclusions were reported, the numbers in each intervention group (compared with total randomised participants), reasons for attrition or exclusions where reported, and any reinclusions in analyses for the review	Small sample size (n=41) and high attrition so a lack of statistical power and inablity to show that combining child and parent interactive education with health coaching might provide benefits over routine medical care. n=41 (18 control, 23 intervention). Attendance rate to each group class was 79%. Nine percent (2/23) dropped out of coaching and 26% (6/23) missed one mutually scheduled coaching…	Attrition bias due to amount, nature, or handling of incomplete outcome data
5. Reporting bias	Selective reporting	Low	State how selective outcome reporting was examined and what was found	Model variables were chosen based on fıt statistics at a p_0.10 significance level due to the small sample size, except average temperature, which was forced into the model for physical activity outcome Sensitivity analysis comparing the children’s gender, primary language spoken in the home, and caregiver BMI, education, and chronic condition between dyads with incomplete and complete data sugge…	Reporting bias due to selective outcome reporting
6. Other bias	External validity (generalisability applicability)	Unclear	State any important concerns about bias not covered in the other domains in the tool		Bias due to problems not covered elsewhere
*Assessments should be made for each main outcome or class of outcomes.
Cochrane Risk of Bias Tool
Davis, Sampilo et al, 2013
Bias domain	Source of bias	Authors' judgement (low, unclear, high risk of bias)	Guidance: Support for judgment	Support for judgement	Guidance: Review authors’ judgment (assess as low, unclear or high risk of bias)
1. Selection bias	Random sequence generation	low	Describe the method used to generate the allocation sequence in sufficient detail to allow an assessment of whether it should produce comparable groups	Children within each school were ranked based on an obesity factor (child BMI percentile plus primary parent BMI) and stratified based on a household factor (single or dual parent household), and gender, according to previous research, which indicates these factors are closely linked to obesity and to treatment outcome One child from each stratification was then randomly assigned (via a random nu…	Selection bias (biased allocation to interventions) due to inadequate generation of a randomised sequence
	Allocation concealment	Unlcear	Describe the method used to conceal the allocation sequence in sufficient detail to determine whether intervention allocations could have been foreseen before or during enrolment	Insuffient detail	Selection bias (biased allocation to interventions) due to inadequate concealment of allocations before assignment
2. Performance bias	Blinding of participants and personnel*	Unlcear	Describe all measures used, if any, to blind trial participants and researchers from knowledge of which intervention a participant received. Provide any information relating to whether the intended blinding was effective	Families were notified of their group assignment in a letter sent home from the school - but unlcear if they knew what the other group was.	Performance bias due to knowledge of the allocated interventions by participants and personnel during the study
3. Detection bias	Blinding of outcome assessment*	Unlcear	Describe all measures used, if any, to blind outcome assessment from knowledge of which intervention a participant received. Provide any information relating to whether the intended blinding was effective	Led by trained PHD-level psychologists or trained graduate students/postdoctoral fellows rather than the research team - but unlcear if the research team knew the allocation.	Detection bias due to knowledge of the allocated interventions by outcome assessment
4. Attrition bias	Incomplete outcome data*	Low	Describe the completeness of outcome data for each main outcome, including attrition and exclusions from the analysis. State whether attrition and exclusions were reported, the numbers in each intervention group (compared with total randomised participants), reasons for attrition or exclusions where reported, and any reinclusions in analyses for the review	n=58 (31) telemedicine group, 27 (physician visit group - control) - Analyses indicated at least 20 subjects per group were needed to have a reasonable chance of detecting significance. Attrition was not significantly different by group, but there was a trend for slightly higher attrition in the TM group compared with the PV group. Given the increased treatment demands associated with the TM inte…	Attrition bias due to amount, nature, or handling of incomplete outcome data
5. Reporting bias	Selective reporting	High	State how selective outcome reporting was examined and what was found	All prespecified outcomes were reported Used some non obesity-specific measures - such as the CBCL and the BPFA so difficult to compare findings with existing research. Did not conduct intent-to-treat analyses for this small study. Because this was a stratified design, a matched pair analysis plan was considered post hoc. However, this would have resulted in 25% of the participants being excluded…	Reporting bias due to selective outcome reporting
6. Other bias	External validity (generalisability applicability)	Unlcear	State any important concerns about bias not covered in the other domains in the tool	Small sample (n=58) from several rural areas in only one state; therefore, findings may not generalize to rural areas in other states.	Bias due to problems not covered elsewhere
*Assessments should be made for each main outcome or class of outcomes.
Cochrane Risk of Bias Tool
**Epstein et al, 2005 (Study 1)
Bias domain	Source of bias	Authors' judgement (low, unclear, high risk of bias)	Guidance: Support for judgment	Support for judgement	Guidance: Review authors’ judgment (assess as low, unclear or high risk of bias)
1. Selection bias	Random sequence generation	Low	Describe the method used to generate the allocation sequence in sufficient detail to allow an assessment of whether it should produce comparable groups	aged 8-12y. Participants were recruited from advertisements in local newspapers and flyers in physician and health care provider offices, and they attended a screening session to determine eligibility Families were stratified by child sex and randomly assigned, in two cohorts, to one of two treatment groups	Selection bias (biased allocation to interventions) due to inadequate generation of a randomised sequence
	Allocation concealment	Unclear	Describe the method used to conceal the allocation sequence in sufficient detail to determine whether intervention allocations could have been foreseen before or during enrolment	Insuffient detail	Selection bias (biased allocation to interventions) due to inadequate concealment of allocations before assignment
2. Performance bias	Blinding of participants and personnel*	GE UNCLEAR (MAF - High)	Describe all measures used, if any, to blind trial participants and researchers from knowledge of which intervention a participant received. Provide any information relating to whether the intended blinding was effective	Insuffient detail	Performance bias due to knowledge of the allocated interventions by participants and personnel during the study
3. Detection bias	Blinding of outcome assessment*	GE UNCLEAR (MAF - High)	Describe all measures used, if any, to blind outcome assessment from knowledge of which intervention a participant received. Provide any information relating to whether the intended blinding was effective	Insuffient detail	Detection bias due to knowledge of the allocated interventions by outcome assessment
4. Attrition bias	Incomplete outcome data*	(GE Unclear) MAF - LOW	Describe the completeness of outcome data for each main outcome, including attrition and exclusions from the analysis. State whether attrition and exclusions were reported, the numbers in each intervention group (compared with total randomised participants), reasons for attrition or exclusions where reported, and any reinclusions in analyses for the review	n=41 Prior to attending the first treatment session, and before being informed of group assignment, 3 families decided not to participate and were dropped from analyses. Complete height and weight data at 24 months was available for 35 of the 41 families Self-reported measures - Previous Day Physical Activity Recall. The questionnaire has excellent reliability, with interrater reliability of .98.…	Attrition bias due to amount, nature, or handling of incomplete outcome data
5. Reporting bias	Selective reporting	Unlcear	State how selective outcome reporting was examined and what was found	All prespecified outcomes were reported Results did not show differential effects of reinforcing youth for increasing alternatives to eating in a standard family- based treatment of pediatric obesity (the pattern of changes in alternatives to eating and physical activity that can also be alternatives to eating were not coordinated). Failure to coordinate the multiple changes may have impaired the…	Reporting bias due to selective outcome reporting
6. Other bias		Unlcear	State any important concerns about bias not covered in the other domains in the tool		Bias due to problems not covered elsewhere
*Assessments should be made for each main outcome or class of outcomes.
Cochrane Risk of Bias Tool
Lee et al, 2014 "Health Promoting School" (HPS)
Bias domain	Source of bias	Authors' judgement (low, unclear, high risk of bias)	Guidance: Support for judgment	Support for judgement	Guidance: Review authors’ judgment (assess as low, unclear or high risk of bias)
1. Selection bias	Random sequence generation	Low	Describe the method used to generate the allocation sequence in sufficient detail to allow an assessment of whether it should produce comparable groups	Overweight and obese students aged between 8 and 12y - 16 schools replied and based on the prevalence of obesity children in the school, school district, readiness of the school, and also similarity in sociodemographic background among participating schools, 6 schools were selected to participate. In Hong Kong, all students undergo anthropometric measurements annually with results recorded so tea…	Selection bias (biased allocation to interventions) due to inadequate generation of a randomised sequence
	Allocation concealment	Unlcear	Describe the method used to conceal the allocation sequence in sufficient detail to determine whether intervention allocations could have been foreseen before or during enrolment	Insuffient detail	Selection bias (biased allocation to interventions) due to inadequate concealment of allocations before assignment
2. Performance bias	Blinding of participants and personnel*	Low	Describe all measures used, if any, to blind trial participants and researchers from knowledge of which intervention a participant received. Provide any information relating to whether the intended blinding was effective	Researchers taking measurements were blinded to exoerimental condition	Performance bias due to knowledge of the allocated interventions by participants and personnel during the study
3. Detection bias	Blinding of outcome assessment*	Unlcear	Describe all measures used, if any, to blind outcome assessment from knowledge of which intervention a participant received. Provide any information relating to whether the intended blinding was effective	Insuffient detail	Detection bias due to knowledge of the allocated interventions by outcome assessment
4. Attrition bias	Incomplete outcome data*	High	Describe the completeness of outcome data for each main outcome, including attrition and exclusions from the analysis. State whether attrition and exclusions were reported, the numbers in each intervention group (compared with total randomised participants), reasons for attrition or exclusions where reported, and any reinclusions in analyses for the review	Among 165 participants, 80 and 85 were randomised to the intervention and control arms. Some students had other prior committed extra-curricular activities clashing with time schedule of this programme so 106 participants finally enrolled in the study with 57 participants per group. 53 participants completed the 4m intervention. 43 (75%) and 51 (89%) attended the 4m and the 8m follow up respectiv…	Attrition bias due to amount, nature, or handling of incomplete outcome data
5. Reporting bias	Selective reporting	Unlcear	State how selective outcome reporting was examined and what was found	A wait list control group may artificially inflate estimates of the intervention effect. Unable to determine if environment component was essential to success. All prespecified outcomes were reported. Although statistical significant improvements were observed only on few health behaviours, the reverse trend was observed for control group	Reporting bias due to selective outcome reporting
6. Other bias		Low	State any important concerns about bias not covered in the other domains in the tool	Contamination avoided by schools implementing a series of school-based activities promoting healthy eating and active lifestyles throughout the project period under the broad HPS program approach enhancing the awareness of health lifestyle for all students. Reduced contamination effect for intervention group as they received the tailor-made weight management program as well as whole school approa…	Bias due to problems not covered elsewhere
*Assessments should be made for each main outcome or class of outcomes.
Cochrane Risk of Bias Tool
Reinehr et al, 2010 "Obeldicks light (adapted for overweight rather than obese children)
Bias domain	Source of bias	Authors' judgement (low, unclear, high risk of bias)	Guidance: Support for judgment	Support for judgement	Guidance: Review authors’ judgment (assess as low, unclear or high risk of bias)
1. Selection bias	Random sequence generation	Low	Describe the method used to generate the allocation sequence in sufficient detail to allow an assessment of whether it should produce comparable groups	Overweight children age 8-16y - obese children excluded. Families invited for participation by media (newspapers, radio) and their general practitioners Children were randomized in the control group (waiting period of 6m) or in the intervention group (6m intervention) using a computer generated randomization list	Selection bias (biased allocation to interventions) due to inadequate generation of a randomised sequence
	Allocation concealment	Unclear	Describe the method used to conceal the allocation sequence in sufficient detail to determine whether intervention allocations could have been foreseen before or during enrolment	Insuffient detail	Selection bias (biased allocation to interventions) due to inadequate concealment of allocations before assignment
2. Performance bias	Blinding of participants and personnel*	High	Describe all measures used, if any, to blind trial participants and researchers from knowledge of which intervention a participant received. Provide any information relating to whether the intended blinding was effective	Blinding not possible due to the nature of the intervention	Performance bias due to knowledge of the allocated interventions by participants and personnel during the study
3. Detection bias	Blinding of outcome assessment*	Unclear	Describe all measures used, if any, to blind outcome assessment from knowledge of which intervention a participant received. Provide any information relating to whether the intended blinding was effective	Insuffient detail	Detection bias due to knowledge of the allocated interventions by outcome assessment
4. Attrition bias	Incomplete outcome data*	Unclear	Describe the completeness of outcome data for each main outcome, including attrition and exclusions from the analysis. State whether attrition and exclusions were reported, the numbers in each intervention group (compared with total randomised participants), reasons for attrition or exclusions where reported, and any reinclusions in analyses for the review	Questionnaires used in other studies but not validated for the population in this study Self reported data may be limiting (e.g. surprising finding of an increase in sports activities in CG) Small sample but low drop out n=66 - Control group n = 32 (including 5 drop-outs) or intervention n = 34 (1 drop out). In intervention group all children and their parents (except for the family who dropped-o…	Attrition bias due to amount, nature, or handling of incomplete outcome data
5. Reporting bias	Selective reporting	Low	State how selective outcome reporting was examined and what was found	All prespecified outcomes were reported Since PA training, behaviour counselling, and nutritional education were performed simultaneously in the intervention group, it was difficult to distinguish the impact of each of them on overweight reduction SIGNIFICANT BETWEEN GROUPS EFFECTS (DIET) In IG, energy (kcal/day), fat and sugar intake decreased significantly, while percentage protein content in d…	Reporting bias due to selective outcome reporting
6. Other bias		Unlcear	State any important concerns about bias not covered in the other domains in the tool	Other predictor factors not analyzed in this study (e.g. maternal BMI) may have influenced results. However, a previous study showed that the study population did not differ from a general population in Germany concerning social or migration status, supporting the generalisability of our results. No follow up so unclear how effects were maintained.	Bias due to problems not covered elsewhere
*Assessments should be made for each main outcome or class of outcomes.
Cochrane Risk of Bias Tool
Robertson et al, 2017 "Families for Health v2" (FFH)
Bias domain	Source of bias	Authors' judgement (low, unclear, high risk of bias)	Guidance: Support for judgment	Support for judgement	Guidance: Review authors’ judgment (assess as low, unclear or high risk of bias)
1. Selection bias	Random sequence generation	Low	Describe the method used to generate the allocation sequence in sufficient detail to allow an assessment of whether it should produce comparable groups	Stratified randomisation by family; target of 120 families. n=115 familiess/ 128 children aged 6-11y 3 National Health Service Primary Care Trusts Randomisation, via a central telephone registration and randomisation service of Warwick Clinical Trials Unit, was stratified by locality using biased coin (p=2/3) minimisation to ensure approximately equal-sized arms.	Selection bias (biased allocation to interventions) due to inadequate generation of a randomised sequence
	Allocation concealment	High	Describe the method used to conceal the allocation sequence in sufficient detail to determine whether intervention allocations could have been foreseen before or during enrolment	Families could not be blinded to treatment allocation	Selection bias (biased allocation to interventions) due to inadequate concealment of allocations before assignment
2. Performance bias	Blinding of participants and personnel*	Low	Describe all measures used, if any, to blind trial participants and researchers from knowledge of which intervention a participant received. Provide any information relating to whether the intended blinding was effective	Every effort was made to ensure that allocation remained unknown to researchers.	Performance bias due to knowledge of the allocated interventions by participants and personnel during the study
3. Detection bias	Blinding of outcome assessment*	Unlcear	Describe all measures used, if any, to blind outcome assessment from knowledge of which intervention a participant received. Provide any information relating to whether the intended blinding was effective	Insuffient detail	Detection bias due to knowledge of the allocated interventions by outcome assessment
4. Attrition bias	Incomplete outcome data*	Unclear	Describe the completeness of outcome data for each main outcome, including attrition and exclusions from the analysis. State whether attrition and exclusions were reported, the numbers in each intervention group (compared with total randomised participants), reasons for attrition or exclusions where reported, and any reinclusions in analyses for the review	All analyses were performed on an intention-to-treat basis Target 60 families in intervention arm and 60 families in control arm. If 30% of families dropped out, the study would retain power of 88%. n=115 familiess/ 128 children - 56 (63 children) allocated to FFH and 59 (65 children) to UC. Of the 194 families assessed for eligibility, 79 were excluded with reasons reported. Six families withdre…	Attrition bias due to amount, nature, or handling of incomplete outcome data
5. Reporting bias	Selective reporting	High	State how selective outcome reporting was examined and what was found	The decision to compare FFH with ‘UC’ across three sites within the West Midlands meant that the control arm had very varied interventions, which had been developed and improved to suit the needs of their local communities during the time taken to obtain funding and set up the trial. In effect, there was ‘no treatment’ control group. Sites varied in terms of socioeconomic status and ethnic divers…	Reporting bias due to selective outcome reporting
6. Other bias		Unclear	State any important concerns about bias not covered in the other domains in the tool	The pre-post pilot was possibly an inadequate study design to inform the decision to proceed to a full-scale trial Pilot intervention was delivered by a small team of four experienced facilitators at one site, so may have been some reduction in facilitator skills in the RCT when run at scale across three sites by 17 facilitators mostly new to delivering the programme	Bias due to problems not covered elsewhere
*Assessments should be made for each main outcome or class of outcomes.
Cochrane Risk of Bias Tool
West et al, 2010 "Group Lifestyle Triple P" (Positive Parenting Program)
Bias domain	Source of bias	Authors' judgement (low, unclear, high risk of bias)	Guidance: Support for judgment	Support for judgement	Guidance: Review authors’ judgment (assess as low, unclear or high risk of bias)
1. Selection bias	Random sequence generation	Low	Describe the method used to generate the allocation sequence in sufficient detail to allow an assessment of whether it should produce comparable groups	Children aged 4-11y No significant sociodemographic differences between the conditions but more girls than boys. Once 10 families had registered at a particular venue, the group was randomly allocated to either the intervention condition (start immediately) or the waitlist control condition (start in 12 weeks time). Groups were allocated to conditions according to a list of computer generated ran…	Selection bias (biased allocation to interventions) due to inadequate generation of a randomised sequence
	Allocation concealment	High	Describe the method used to conceal the allocation sequence in sufficient detail to determine whether intervention allocations could have been foreseen before or during enrolment	Final allocation concealment and blinded outcome assessment not possible due to limited staff and resources.	Selection bias (biased allocation to interventions) due to inadequate concealment of allocations before assignment
2. Performance bias	Blinding of participants and personnel*	High	Describe all measures used, if any, to blind trial participants and researchers from knowledge of which intervention a participant received. Provide any information relating to whether the intended blinding was effective	Final allocation concealment and blinded outcome assessment not possible due to limited staff and resources.	Performance bias due to knowledge of the allocated interventions by participants and personnel during the study
3. Detection bias	Blinding of outcome assessment*	High	Describe all measures used, if any, to blind outcome assessment from knowledge of which intervention a participant received. Provide any information relating to whether the intended blinding was effective	Final allocation concealment and blinded outcome assessment not possible due to limited staff and resources.	Detection bias due to knowledge of the allocated interventions by outcome assessment
4. Attrition bias	Incomplete outcome data*	High	Describe the completeness of outcome data for each main outcome, including attrition and exclusions from the analysis. State whether attrition and exclusions were reported, the numbers in each intervention group (compared with total randomised participants), reasons for attrition or exclusions where reported, and any reinclusions in analyses for the review	Main strength is evaluation of the clinical importance of intervention outcomes by calculating effect sizes and reliable change indices, and performing normative comparisons Included measures of parenting and protocol adherence, and involved a one-year follow-up. To provide realistic estimates of intervention efficacy, intention-to-treat procedures were used and effect sizes for intervention outc…	Attrition bias due to amount, nature, or handling of incomplete outcome data
5. Reporting bias	Selective reporting	Low	State how selective outcome reporting was examined and what was found	All prespecified outcomes were reported - with significant positive effects *though non specific to diet or PA (all hypotheses supported)	Reporting bias due to selective outcome reporting
6. Other bias		High	State any important concerns about bias not covered in the other domains in the tool	Families were eligible to participate if the parent described the child’s body size as overweight - 26% OW/ 74.3% OB (i.e. self referred and motivated to do something about it). As participants were randomly allocated to condition their motivational state does not confound the findings, but may affect generalisability of the results. Participants were mainly white, well-educated parents with mode…	Bias due to problems not covered elsewhere
*Assessments should be made for each main outcome or class of outcomes.
Cochrane Risk of Bias Tool
Wright et al, 2013 "HEAT"
Bias domain	Source of bias	Authors' judgement (low, unclear, high risk of bias)	Guidance: Support for judgment	Support for judgement	Guidance: Review authors’ judgment (assess as low, unclear or high risk of bias)
1. Selection bias	Random sequence generation	Unclear	Describe the method used to generate the allocation sequence in sufficient detail to allow an assessment of whether it should produce comparable groups	non-equivalent study arms following randomization parent‐child dyads - child 9‐12 yrs, BMI > 95th percentile), low income, african-american. All due for due for an annual well-child exam in the next 4m.. Delivered by interactive voice technology. 50 parent-child dyads were randomized in blocks of six to either intervention condition (HEAT) or wait-list control condition (WLC). The blocks were gen…	Selection bias (biased allocation to interventions) due to inadequate generation of a randomised sequence
	Allocation concealment	Low	Describe the method used to conceal the allocation sequence in sufficient detail to determine whether intervention allocations could have been foreseen before or during enrolment	Assignments to condition were placed in sealed envelopes and opened after all baseline measures were completed.	Selection bias (biased allocation to interventions) due to inadequate concealment of allocations before assignment
2. Performance bias	Blinding of participants and personnel*	Unclear	Describe all measures used, if any, to blind trial participants and researchers from knowledge of which intervention a participant received. Provide any information relating to whether the intended blinding was effective	Participants knew which condition they were in after baseline measures	Performance bias due to knowledge of the allocated interventions by participants and personnel during the study
3. Detection bias	Blinding of outcome assessment*	Unclear	Describe all measures used, if any, to blind outcome assessment from knowledge of which intervention a participant received. Provide any information relating to whether the intended blinding was effective	Insufficent detail	Detection bias due to knowledge of the allocated interventions by outcome assessment
4. Attrition bias	Incomplete outcome data*	Unclear	Describe the completeness of outcome data for each main outcome, including attrition and exclusions from the analysis. State whether attrition and exclusions were reported, the numbers in each intervention group (compared with total randomised participants), reasons for attrition or exclusions where reported, and any reinclusions in analyses for the review	Limited statistical power - small sample size n=50 - HEAT (n=24) and WLC (n=26). Seven dyads did not complete the follow-up assessments however, there were no significant differences on demographic variables between those who dropped out and those who completed the study. Two mothers in the WLC were excluded from the weight analyses. One mother was in a wheelchair and the other reported that she …	Attrition bias due to amount, nature, or handling of incomplete outcome data
5. Reporting bias	Selective reporting	Unlear	State how selective outcome reporting was examined and what was found	The HEAT group was split into two groups based on a clinical decision of what might be considered meaningful use - comparison of high versus low users of the intervention suggested that children who completed more calls gained less weight. It also suggested that parents who made more calls showed more improvements in dietary fat and calorie intake All prespecified outcomes were reported Significa…	Reporting bias due to selective outcome reporting
6. Other bias		Unclear	State any important concerns about bias not covered in the other domains in the tool	About half the HEAT families reported they would rather use a program like this on a website - suuggests that technology preferences may influence the effectiveness of a given obesity treatment. The use of PC-HEAT (integration with primary care) was not adequately tested - many participants were unable to complete a scheduled routine health care maintenance visit on schedule and for those who did…	Bias due to problems not covered elsewhere
*Assessments should be made for each main outcome or class of outcomes.
Cochrane Risk of Bias Tool
Cohen et al, 2018 "McGill Youth Lifestyle Intervention with Food and Exercise" (MY LIFE )
Bias domain	Source of bias	Authors' judgement (low, unclear, high risk of bias)	Guidance: Support for judgment	Support for judgement	Guidance: Review authors’ judgment (assess as low, unclear or high risk of bias)
1. Selection bias	Random sequence generation	Low	Describe the method used to generate the allocation sequence in sufficient detail to allow an assessment of whether it should produce comparable groups	Children aged 6-8y Majority of parents in this study were self-identified as overweight or obese. Using a computer-generated list, a dietitian randomized and allocated (1:1:1) children to 1 of 3 groups (Standard, Modified or control) by sex and BMI percentile for age The only differences between standard and moderate were the amount of milk and milk product intakes they were guided to consume and…	Selection bias (biased allocation to interventions) due to inadequate generation of a randomised sequence
	Allocation concealment	Unclcear	Describe the method used to conceal the allocation sequence in sufficient detail to determine whether intervention allocations could have been foreseen before or during enrolment	Insufficient detail	Selection bias (biased allocation to interventions) due to inadequate concealment of allocations before assignment
2. Performance bias	Blinding of participants and personnel*	Unclcear	Describe all measures used, if any, to blind trial participants and researchers from knowledge of which intervention a participant received. Provide any information relating to whether the intended blinding was effective	Insufficient detail	Performance bias due to knowledge of the allocated interventions by participants and personnel during the study
3. Detection bias	Blinding of outcome assessment*	Unclcear	Describe all measures used, if any, to blind outcome assessment from knowledge of which intervention a participant received. Provide any information relating to whether the intended blinding was effective	Insufficient detail	Detection bias due to knowledge of the allocated interventions by outcome assessment
4. Attrition bias	Incomplete outcome data*	High	Describe the completeness of outcome data for each main outcome, including attrition and exclusions from the analysis. State whether attrition and exclusions were reported, the numbers in each intervention group (compared with total randomised participants), reasons for attrition or exclusions where reported, and any reinclusions in analyses for the review	n=78 Low attrition - 75 children completed the 6-month visit and 73 children completed the 12-month visit. Self-reported diet and PA measures The CEBQ was used to capture changes in eating behaviors over the course of a year, an outcome not been previously reported - The subjectivity of the CEBQ offers advantages: Completed by caregivers and provides a global understanding to underlying behaviora…	Attrition bias due to amount, nature, or handling of incomplete outcome data
5. Reporting bias	Selective reporting	High	State how selective outcome reporting was examined and what was found	All prespecified outcomes were reported Intervention groups favourably changed eating behaviors (food approach scores on CEBQ) Results are not adjusted for differences in sociodemographic variables that may differ among groups PA is not discussed at all in the discussion Due to the low return of 3-day food diaries, our statistical analyses and modelling did not include dietary variables	Reporting bias due to selective outcome reporting
6. Other bias		Unclear	State any important concerns about bias not covered in the other domains in the tool		Bias due to problems not covered elsewhere
*Assessments made for each dietary and PA, and psychological behavioural outcome
Cochrane Risk of Bias Tool
Davis et al, 2016
Bias domain	Source of bias	Authors' judgement (low, unclear, high risk of bias)	Guidance: Support for judgment	Support for judgement	Guidance: Review authors’ judgment (assess as low, unclear or high risk of bias)
1. Selection bias	Random sequence generation	Low	Describe the method used to generate the allocation sequence in sufficient detail to allow an assessment of whether it should produce comparable groups	5-12y Rural school-based no significant differences across groups at baseline on any demographic factors or outcome measures The first 11 schools to assign an on-site representative for the project who completed relevant training were recruited for the study and randomly assigned to telemedicine or telephone. Randomization occurred at the school level - all participants from each school were assi…	Selection bias (biased allocation to interventions) due to inadequate generation of a randomised sequence
	Allocation concealment	Unclear	Describe the method used to conceal the allocation sequence in sufficient detail to determine whether intervention allocations could have been foreseen before or during enrolment	Insufficient detail	Selection bias (biased allocation to interventions) due to inadequate concealment of allocations before assignment
2. Performance bias	Blinding of participants and personnel*	Unclear	Describe all measures used, if any, to blind trial participants and researchers from knowledge of which intervention a participant received. Provide any information relating to whether the intended blinding was effective	Insufficient detail	Performance bias due to knowledge of the allocated interventions by participants and personnel during the study
3. Detection bias	Blinding of outcome assessment*	Low	Describe all measures used, if any, to blind outcome assessment from knowledge of which intervention a participant received. Provide any information relating to whether the intended blinding was effective	Group comparison analyses were planned a priori and conducted by an independent statistician	Detection bias due to knowledge of the allocated interventions by outcome assessment
4. Attrition bias	Incomplete outcome data*	Low	Describe the completeness of outcome data for each main outcome, including attrition and exclusions from the analysis. State whether attrition and exclusions were reported, the numbers in each intervention group (compared with total randomised participants), reasons for attrition or exclusions where reported, and any reinclusions in analyses for the review	Low statistical power (n=103) - 42 attended a school assigned to telemedicine and 61 attended a school assigned to telephone Remarkably low attrition rates (10%) could be attributed to the fact that intervention was designed to be accessible and convenient for a rural population who often have poor access to health-related resources. The overall attendance rate for the sample was 89.40% with no s…	Attrition bias due to amount, nature, or handling of incomplete outcome data
5. Reporting bias	Selective reporting	Low	State how selective outcome reporting was examined and what was found	Non significant findings (though positive changes did occur via both modalities, particularly for psychological variables) Remarkable that an intervention that was only slightly effective with lowering child BMI had such low attrition	Reporting bias due to selective outcome reporting
6. Other bias		Unclear	State any important concerns about bias not covered in the other domains in the tool	Participants all from rural areas in only one state, so findings may not generalize to rural areas in other states Sample was predominantly Caucasian (expected) Some of measures (CBCL, BPFAS) were not obesity specific Children in both groups met the national recommendation of 60 minutes of moderate to vigorous physical activity per day at all time points- so more active at baseline than expected.…	Bias due to problems not covered elsewhere
*Assessments made for each dietary and PA, and psychological behavioural outcome
Cochrane Risk of Bias Tool
Guo et al, 2015
Bias domain	Source of bias	Authors' judgement (low, unclear, high risk of bias)	Guidance: Support for judgment	Support for judgement	Guidance: Review authors’ judgment (assess as low, unclear or high risk of bias)
1. Selection bias	Random sequence generation	Unclear	Describe the method used to generate the allocation sequence in sufficient detail to allow an assessment of whether it should produce comparable groups	Children in grades 3-5 (25 boys, 16 girls) Two similar schools from two districts of Shantou, China were randomised Insufficient detail	Selection bias (biased allocation to interventions) due to inadequate generation of a randomised sequence
	Allocation concealment	Unclear	Describe the method used to conceal the allocation sequence in sufficient detail to determine whether intervention allocations could have been foreseen before or during enrolment	Insufficient detail	Selection bias (biased allocation to interventions) due to inadequate concealment of allocations before assignment
2. Performance bias	Blinding of participants and personnel*	Unclear	Describe all measures used, if any, to blind trial participants and researchers from knowledge of which intervention a participant received. Provide any information relating to whether the intended blinding was effective	Insufficient detail	Performance bias due to knowledge of the allocated interventions by participants and personnel during the study
3. Detection bias	Blinding of outcome assessment*	Unclear	Describe all measures used, if any, to blind outcome assessment from knowledge of which intervention a participant received. Provide any information relating to whether the intended blinding was effective	Insufficient detail	Detection bias due to knowledge of the allocated interventions by outcome assessment
4. Attrition bias	Incomplete outcome data*	High	Describe the completeness of outcome data for each main outcome, including attrition and exclusions from the analysis. State whether attrition and exclusions were reported, the numbers in each intervention group (compared with total randomised participants), reasons for attrition or exclusions where reported, and any reinclusions in analyses for the review	Small sample (n=41) and short period of intervention 26 students of intervention group/ 15 control group completed the 1y intervention 2/26 intervention students could not finish the whole trial because of transferring to another school and one student did not have the physical examination and blood test (only completed the questionnaire and self-concept scale). 11.6% drop-out rate in interventio…	Attrition bias due to amount, nature, or handling of incomplete outcome data
5. Reporting bias	Selective reporting	Low	State how selective outcome reporting was examined and what was found	All prespecified outcomes were reported Significant dietary, PA, and sedentary behaviour changes found in the students of the intervention group (based on scores of the questionnaire)	Reporting bias due to selective outcome reporting
6. Other bias		Unclear	State any important concerns about bias not covered in the other domains in the tool	School-based, which could not control students’ diet and exercise behaviour out of school. Did not include exposure time of intervention as an analytical parameter - duration of exposure to the intervention could have unpredictable influences on behaioural outcomes.	Bias due to problems not covered elsewhere
*Assessments made for each dietary and PA, and psychological behavioural outcome
Cochrane Risk of Bias Tool
**Nemet et al, 2005
Bias domain	Source of bias	Authors' judgement (low, unclear, high risk of bias)	Guidance: Support for judgment	Support for judgement	Guidance: Review authors’ judgment (assess as low, unclear or high risk of bias)
1. Selection bias	Random sequence generation	GE UNCLEAR (MAF - Low)	Describe the method used to generate the allocation sequence in sufficient detail to allow an assessment of whether it should produce comparable groups	Self referred. Insufficient detail	Selection bias (biased allocation to interventions) due to inadequate generation of a randomised sequence
	Allocation concealment	GE UNCLEAR (MAF - Low)	Describe the method used to conceal the allocation sequence in sufficient detail to determine whether intervention allocations could have been foreseen before or during enrolment	Insufficient detail	Selection bias (biased allocation to interventions) due to inadequate concealment of allocations before assignment
2. Performance bias	Blinding of participants and personnel*	(GE Unclear) MAF - diet and PA HIGH	Describe all measures used, if any, to blind trial participants and researchers from knowledge of which intervention a participant received. Provide any information relating to whether the intended blinding was effective	Insufficient detail	Performance bias due to knowledge of the allocated interventions by participants and personnel during the study
3. Detection bias	Blinding of outcome assessment*	(GE Unclear) MAF - HIGH	Describe all measures used, if any, to blind outcome assessment from knowledge of which intervention a participant received. Provide any information relating to whether the intended blinding was effective	Dietitians were involved in the assessment CHECK	Detection bias due to knowledge of the allocated interventions by outcome assessment
4. Attrition bias	Incomplete outcome data*	(GE Unclear) MAF - HIGH	Describe the completeness of outcome data for each main outcome, including attrition and exclusions from the analysis. State whether attrition and exclusions were reported, the numbers in each intervention group (compared with total randomised participants), reasons for attrition or exclusions where reported, and any reinclusions in analyses for the review	n= 54 (n=24 intervention participants compared with 22 age and gender-matched control participants) Power analysis required 18 participants per group for 90% power Allocated intentionally an unequal number of participants to each group, on the basis of previous experience Dropouts (20%) were attributable to difficulties with transportation to training facility, and losses to follow-up monitoring …	Attrition bias due to amount, nature, or handling of incomplete outcome data
5. Reporting bias	Selective reporting	Low	State how selective outcome reporting was examined and what was found	Significant between group effects in increase in leisure-time PA among the intervention participants, compared with a small decrease among the control participants - remaining significant at 1y follow-up within groups (almost reached significance between groups)	Reporting bias due to selective outcome reporting
6. Other bias		GE UNCLEAR MAF - NIL	State any important concerns about bias not covered in the other domains in the tool	Compared against a no treatment rather than a standard weight management program Majority of intervention participants refused to undergo blood testing at the 1y follow- up evaluation - so unable to assess whether the short-term positive effects of the intervention on body lipids lasted	Bias due to problems not covered elsewhere
*Assessments made for each dietary and PA, and psychological behavioural outcome

## Sheet: Table S1c Joanna Briggs
*Appraised by MAF as a second rater (n=8/20 interventions) 40%
Joanna Briggs Institute Critical Appraisal - Checklist for Quasi-Experimental Studies (non-randomized experimental studies)							Joanna Briggs Institute Critical Appraisal - Checklist for Quasi-Experimental Studies (non-randomized experimental studies)							Joanna Briggs Institute Critical Appraisal - Checklist for Quasi-Experimental Studies (non-randomized experimental studies)							Joanna Briggs Institute Critical Appraisal - Checklist for Quasi-Experimental Studies (non-randomized experimental studies)							Joanna Briggs Institute Critical Appraisal - Checklist for Quasi-Experimental Studies (non-randomized experimental studies)							Joanna Briggs Institute Critical Appraisal - Checklist for Quasi-Experimental Studies (non-randomized experimental studies)							Joanna Briggs Institute Critical Appraisal - Checklist for Quasi-Experimental Studies (non-randomized experimental studies)							Joanna Briggs Institute Critical Appraisal - Checklist for Quasi-Experimental Studies (non-randomized experimental studies)
Siwik et al, 2013 "Choices"	Yes	No	Unclear	Not applicable	Comments		Watson et al, 2015 "GOALS"	Yes	No	Unclear	Not applicable	Comments		*Wong & Cheng, 2013	Yes	No	Unclear	Not applicable	Comments		*Delamater et al, 2013 "Families Interacting Together for Health" (FIT-4-Health)	Yes	No	Unclear	Not applicable	Comments		*Epstein et al, 2005 STUDY 2	Yes	No	Unclear	Not applicable	Comments		Joosse et al, 2008 "Fit Kids/Fit Families "(FKFF)	Yes	No	Unclear	Not applicable	Comments		Schwartz et al, 2012 "YMCA Healthy Fit & Strong"	Yes	No	Unclear	Not applicable	Comments		*Anderson et al, 2015 "Taking Steps Together" (TST)
1. Is it clear in the study what is the ‘cause’ and what is the ‘effect’ (i.e. there is no confusion about which variable comes first)?	✔️				Intervention effects were shown as regression coefficients, where the outcome was measured at the end of a 3-month interval, and the explanatory variable was time on intervention. Declines in weight and BMI clearly were associated with the lagged intervention design Qualitative data spports quant findings BUT many participants were from non-Hispanic white backgrounds, which along with the small s…		1. Is it clear in the study what is the ‘cause’ and what is the ‘effect’ (i.e. there is no confusion about which variable comes first)?			✔️		Child weight loss has previously been linked to self-esteem improvements but it is not clear whether child weight loss improves self-esteem or improved self-esteem facilitates child weight loss, or both. BMI z-score change during the intervention was not linked to self-perception changes over the same period but was inversely associated with self-perception change from baseline to 12-month follow…		1. Is it clear in the study what is the ‘cause’ and what is the ‘effect’ (i.e. there is no confusion about which variable comes first)?	AGREE				Children in both motivational interviewing and motivational interviewing+ groups showed significant improvement in weight‐related behaviour Effect of the telephone consultation with parents on physical activity level was clearer in the MI+ group "Filial piety" is a unique Asian cultural value, respect for parental authority is seen as an obligation in Hong Kong where it is common for grandparents…		1. Is it clear in the study what is the ‘cause’ and what is the ‘effect’ (i.e. there is no confusion about which variable comes first)?	MAF		GE		Data indicated differences in effects for those who frequented the web site often versus those who did not. No mechamisms discussed however.		1. Is it clear in the study what is the ‘cause’ and what is the ‘effect’ (i.e. there is no confusion about which variable comes first)?	MAF	GE			The independent variable was manipulated as planned, but changes did not result in changes in eating or PA that could be attributed to the changes in alternative behaviors (although eating episodes decreased during the enriched phase, it did not increase when the enriched phase was removed, which would be expected if there was a functional relationship between enriched activities and eating) Poss…		1. Is it clear in the study what is the ‘cause’ and what is the ‘effect’ (i.e. there is no confusion about which variable comes first)?	✔️				Not clear on the hierarchy of BCTs as no discussion of mechanisms		1. Is it clear in the study what is the ‘cause’ and what is the ‘effect’ (i.e. there is no confusion about which variable comes first)?	✔️				No mechanisms discussed		1. Is it clear in the study what is the ‘cause’ and what is the ‘effect’ (i.e. there is no confusion about which variable comes first)?
2. Were the participants included in any comparisons similar?	✔️				All fit criteria for enrolment in the Choices program (all overweight or obese and aged 8-11y) Design-adaptive allocation used to minimize differences between groups as participants entered the study Groups were balanced on most characteristics. The group size for cohort 1 was 15 boys and girls and for cohort 2 was 17 boys and girls.		2. Were the participants included in any comparisons similar?	✔️				Baseline comparison completed. All fit criteria for enrolment in the GOALS program; all obese from socioeconomically deprived communities in Liverpool (92 families lived within the 10% most deprived neighbourhoods in England) 4-16 age range though. 67/ 79 were white British - representative of the Liverpool population, but less diverse than the national population in England and Wales so not able…		2. Were the participants included in any comparisons similar?	AGREE				All obese, selected from grades 5-6 in HK Difference in parent attitudes: Those obese children whose parents and guardians did not agree to them joining the programme were assigned to the control group. Daily eating of junk food was a common habit for most of these children (n = 121, 65·40%), while doing weekly regular exercise was not common (n = 58, 35·37%).		2. Were the participants included in any comparisons similar?				AGREE	overweight status, 8–12 years of age. Single group pre-post		2. Were the participants included in any comparisons similar?				AGREE	n=13 families met inclusion criteria: an 8- to 12-year-old child at or above the 85th BMI percentile; self-reported average of two snacks/day, and an average of at least 90 min/day of free time in their schedule. 69.2% were White,		2. Were the participants included in any comparisons similar?	✔️				All participants were ≥85th percentile for BMI-for-Age overweight or at risk for overweight. Approx 40% of participants asked for scholarship assistance.		2. Were the participants included in any comparisons similar?	✔️				Baseline comparson completed. All 6–11 years of age with a BMI for age and sex greater than the 85th percentile 32 (54%) were African American		2. Were the participants included in any comparisons similar?
3. Were the participants included in any comparisons receiving similar treatment/care, other than the exposure or intervention of interest?	✔️				Does not say whether usual care was suspended Choices allowed participants to modify their lifestyle individually in relationship to their goals, but all received the same intervention - leader manuals were developed to ensure this.		3. Were the participants included in any comparisons receiving similar treatment/care, other than the exposure or intervention of interest?	✔️						3. Were the participants included in any comparisons receiving similar treatment/care, other than the exposure or intervention of interest?	MAF		GE		Assigned to one of two intervention groups according to their choices of intervention noted in the consent form.		3. Were the participants included in any comparisons receiving similar treatment/care, other than the exposure or intervention of interest?				AGREE	Single group pre-post		3. Were the participants included in any comparisons receiving similar treatment/care, other than the exposure or intervention of interest?	MAF			GE	Single group, repeated measures (baseline, treatment, second baseline) Own comparison		3. Were the participants included in any comparisons receiving similar treatment/care, other than the exposure or intervention of interest?			✔️		Single group, pre-post design		3. Were the participants included in any comparisons receiving similar treatment/care, other than the exposure or intervention of interest?			✔️				3. Were the participants included in any comparisons receiving similar treatment/care, other than the exposure or intervention of interest?
4. Was there a control group?	✔️				3m lagged intervention control - half the children crossed over to intervention after 6m in the study		4. Was there a control group?		✔️					4. Was there a control group?	AGREE				2x treatment arms: (i) motivational interviewing (ii) motivational interviewing+ telephone counselling ror parents, and a control group		4. Was there a control group?		AGREE					4. Was there a control group?	MAF	GE			Single group, repeated measures (baseline, treatment, second baseline)		4. Was there a control group?		✔️					4. Was there a control group?		✔️			Single group, pre-post design		4. Was there a control group?
5. Were there multiple measurements of the outcome both pre and post the intervention/exposure?	✔️				baseline, 3m, 6m, 9m, 12m, 15m		5. Were there multiple measurements of the outcome both pre and post the intervention/exposure?	✔️				baseline, post intervetion (6m), 12m		5. Were there multiple measurements of the outcome both pre and post the intervention/exposure?		MAF	GE				5. Were there multiple measurements of the outcome both pre and post the intervention/exposure?		MAF	GE				5. Were there multiple measurements of the outcome both pre and post the intervention/exposure?		AGREE					5. Were there multiple measurements of the outcome both pre and post the intervention/exposure?	✔️				week 2, week 11		5. Were there multiple measurements of the outcome both pre and post the intervention/exposure?	✔️				Baseline, 3m, 6m (only BMI), 12m		5. Were there multiple measurements of the outcome both pre and post the intervention/exposure?
6. Was follow up complete and if not, were differences between groups in terms of their follow up adequately described and analyzed?	✔️				Low attrition. 75 families responded to outreach and 35 subsequently consented. Two families were unable to attend sessions, but the children received nearly all the measurements and are included in all analyses. The remaining 30 children attended 75% of class sessions, on average. The data completion rate was 95%.		6. Was follow up complete and if not, were differences between groups in terms of their follow up adequately described and analyzed?		✔️			HIgh attrtion. Forty-five children provided complete baseline and post-intervention self-perception data. Plus qualitative data. Attrition rate (48%) so results should be interpreted with caution. Sample was predominantly White-British so results can't be generalised to other ethnic populations living in the UK		6. Was follow up complete and if not, were differences between groups in terms of their follow up adequately described and analyzed?		AGREE					6. Was follow up complete and if not, were differences between groups in terms of their follow up adequately described and analyzed?	MAF		GE		75% of families (n=18/24) returned for follow-up But - limited to a 1-month trial, so not clear whether children who continue to use the program would be able to maintain this rate of weight loss or if at some point they would revert to previous habits Only 6 dropped out		6. Was follow up complete and if not, were differences between groups in terms of their follow up adequately described and analyzed?	AGREE						6. Was follow up complete and if not, were differences between groups in terms of their follow up adequately described and analyzed?	✔️				No follow-up beyond the 12wk program Low attrition. 84% completion rate		6. Was follow up complete and if not, were differences between groups in terms of their follow up adequately described and analyzed?		✔️			Small number of participants and a 29% dropout rate at the 12m follow-up. Average attendance across the four sites was 60% for physical activity sessions and 51% for nutrition sessions		6. Was follow up complete and if not, were differences between groups in terms of their follow up adequately described and analyzed?
7. Were the outcomes of participants included in any comparisons measured in the same way?	✔️						7. Were the outcomes of participants included in any comparisons measured in the same way?	✔️						7. Were the outcomes of participants included in any comparisons measured in the same way?	AGREE						7. Were the outcomes of participants included in any comparisons measured in the same way?	AGREE						7. Were the outcomes of participants included in any comparisons measured in the same way?	AGREE						7. Were the outcomes of participants included in any comparisons measured in the same way?	✔️						7. Were the outcomes of participants included in any comparisons measured in the same way?	✔️						7. Were the outcomes of participants included in any comparisons measured in the same way?
8. Were outcomes measured in a reliable way?	✔️				Validated PA recall focused on recalling activities before, during, and after school of the current and previous day. Although self-reports have the potential for bias, this type of recall was deemed appropriate to the age group. It was chosen instead of pedometers to lower the ongoing study burden for participant. Eating behaviour more subjective Authors acknowledged more objective outcome measu…		8. Were outcomes measured in a reliable way?			✔️		Qualitative surveys open to bias Self-perception questionnaire was validated.		8. Were outcomes measured in a reliable way?		AGREE			A diet journal was used to assess the obese children's daily food intake. This was deemed a common and reliable method to assess the amount of energy expended and nutrients consumed - though can be open to bias as subjective. An exercise log was used to track the type and amount of exercise to evaluate the children's favourite activities and their amount of calories consumed. Self‐report energy e…		8. Were outcomes measured in a reliable way?		AGREE			Measurement relied on self-report of children. Internal consistencies of the IMI-WM total score and subscales were relatively low and future studies should more fully examine its reliability and validity, as well as the YRBS items for dietary and physical activity behaviors in larger study samples BUT did also use an obective measure for PA in pedometers		8. Were outcomes measured in a reliable way?	MAF	GE			Order of the experimental phases (enriched and nonenriched) was counterbalanced across participants during the second and third phases. Self-report habit books (over 3 days) with parental monitoring (coded by 2 reviewers), and 24h diet recalls over the phone - children were provided with food models, measuring cups, measuring spoons, and a ruler to help estimate portion sizes Not validated Activi…		8. Were outcomes measured in a reliable way?			✔️		Reliance on self-recording of behavior as measures (participants relayed their perception that such recording was tedious, and therefore it is possible that not all behavior was diligently reported. Also parents’ estimates of their children’s increases in PA were substantially greater than the children’s own estimates Used Rosenberg self esteem scale which is validated		8. Were outcomes measured in a reliable way?		✔️			Diet and PA questionnaire was brief and designed by Pinciple onvestigator. Self-reported and may have been subject to recall bias		8. Were outcomes measured in a reliable way?
9. Was appropriate statistical analysis used?	✔️				Limited detail on qualitative data analysis		9. Was appropriate statistical analysis used?	✔️						9. Was appropriate statistical analysis used?	GE	MAF			Should not be t-test = ANOVA		9. Was appropriate statistical analysis used?	MAF	GE	✔️		2-group/ t-test 1-tail Statistical analyses did not control for type I error because of the small sample		9. Was appropriate statistical analysis used?	AGREE				Power limited by very small sample size (n=13)		9. Was appropriate statistical analysis used?	✔️						9. Was appropriate statistical analysis used?	✔️				Paired t-tests		9. Was appropriate statistical analysis used?
VERDICT: MODERATE	9	0	0				VERDICT: MODERATE	5	2	2		The first article to use the Template for Intervention Description and Replication (TIDieR) checklist to describe a childhood obesity treatment intervention. The first article to use the Template for Intervention Description and Replication (TIDieR) checklist to describe a childhood obesity treatment intervention.		VERDICT: MODERATE							VERDICT: WEAK	3	3	1	2			VERDICT: WEAK	7	1		1			VERDICT: WEAK	6	1	2				VERDICT: WEAK	5	3	1				VERDICT: WEAK
															4	4	1
Joanna Briggs Institute Critical Appraisal - Checklist for Analytical Cross Sectional Studies							Joanna Briggs Institute Critical Appraisal - Checklist for Analytical Cross Sectional Studies
Chaiopanont, 2016	Yes	No	Unclear	Not applicable	Comments		Elizondo-Montemayor, 2013	Yes	No	Unclear	Not applicable	Comments
1. Were the criteria for inclusion in the sample clearly defined?	✔️				Overweight or obese students		1. Were the criteria for inclusion in the sample clearly defined?	✔️				Inclusion criteria were attendance from first to sixth grade; age 6–12 years; BMI _85th percentile for age and sex; 12-h overnight fast; and signed consent from both parents/care givers and children
2. Were the study subjects and the setting described in detail?	✔️				A comparison sample of 50 students selected from Udom-Suksa Private Primary school. Both schools were private, with similar capacity, and catered to the middle socio-economic class. The case-control method was used. Employed inclusion criteria so that both groups were comparative in most aspects as age group, gender, and body mass index (BMI), matched to each other		2. Were the study subjects and the setting described in detail?	✔️				96 overweight/ obese Mexican children aged 6–12 years, with low-socioeconomic status, set in eight schools
3. Was the exposure measured in a valid and reliable way?	✔️				3y study		3. Was the exposure measured in a valid and reliable way?	✔️
4. Were objective, standard criteria used for measurement of the condition?		✔️			Obesity definitions Pretest was not done due to limitation of time and cases		4. Were objective, standard criteria used for measurement of the condition?	✔️				Obesity definitions
5. Were confounding factors identified?		✔️					5. Were confounding factors identified?	✔️				Voluntary participation and children being singled out when they were called out of class may have caused children and their parents to be more responsive to the intervention.
6. Were strategies to deal with confounding factors stated?		✔️					6. Were strategies to deal with confounding factors stated?		✔️
7. Were the outcomes measured in a valid and reliable way?		✔️			Questionnaires		7. Were the outcomes measured in a valid and reliable way?		✔️			dietetic assessment by means of 24-h diet recalls using a standardised food frequency questionnaire (that includes Mexican foods), and food replicas to aid in estimation of portion sizes; (iii) physical activity recall using previously validated questionnaire
8. Was appropriate statistical analysis used?	✔️						8. Was appropriate statistical analysis used?			✔️		Small sample
VERDICT: MODERATE	4	4					VERDICT: MODERATE	5	2	1
Joanna Briggs Institute Critical Appraisal - Checklist for Case Reports							Joanna Briggs Institute Critical Appraisal - Checklist for Case Reports
Brennan et al, 2009 "Choose Health"	Yes	No	Unclear	Not applicable	Comments		*Janicke, 2013	Yes	No	Unclear	Not applicable	Comments
1. Were patient’s demographic characteristics clearly described?	✔️						1. Were patient’s demographic characteristics clearly described?	AGREE
2. Was the patient’s history clearly described and presented as a timeline?		✔️			Not presented as a timeline		2. Was the patient’s history clearly described and presented as a timeline?	GE		MAF
3. Was the current clinical condition of the patient on presentation clearly described?	✔️						3. Was the current clinical condition of the patient on presentation clearly described?	AGREE
4. Were diagnostic tests or assessment methods and the results clearly described?	✔️						4. Were diagnostic tests or assessment methods and the results clearly described?	GE		MAF
5. Was the intervention(s) or treatment procedure(s) clearly described?	✔️						5. Was the intervention(s) or treatment procedure(s) clearly described?	AGREE
6. Was the post-intervention clinical condition clearly described?	✔️						6. Was the post-intervention clinical condition clearly described?	MAF			GE
7. Were adverse events (harms) or unanticipated events identified and described?	✔️						7. Were adverse events (harms) or unanticipated events identified and described?	GE			MAF
8. Does the case report provide takeaway lessons?	✔️						8. Does the case report provide takeaway lessons?	AGREE
VERDICT: STRONG	7	1					VERDICT: STRONG	5		2	1
Joanna Briggs Institute Critical Appraisal - Checklist for Case Series
Senke, 2012	Yes	No	Unclear	Not applicable	Comments
1. Were there clear criteria for inclusion in the case series?	✔️				All females aged 7-12
2. Was the condition measured in a standard, reliable way for all participants included in the case series?		✔️			Observations of health behaviors were not completely objective and were collected via observations and report by parents and school personnel. Other measures also relied on self-report, including the PAQ-C completed by children. Data could be subject to social desirability or bias Non-significant outcomes likely due to clinical considerations (e.g., plan modifications, withdrawal of study partici…
3. Were valid methods used for identification of the condition for all participants included in the case series?			✔️		Obesity definitions External validity limitations - for each child participant, only one dietary and PA behavior was identified and targeted for this study - unclear how changes in the target health behaviors relate to other specific health behaviors
4. Did the case series have consecutive inclusion of participants?		✔️			Multiple baseline design across behaviors, the intervention was introduced across dietary and physical activity behaviors in a staggered fashion over time for each child Due to the clinical realities of the participants in this project and the nature of the individualized health behaviors chosen for each child, it was not always realistic to withhold treatment while waiting for stability of the d…
5. Did the case series have complete inclusion of participants?		✔️			Missing data points (due to plan changes, mother withdrawal, self-reporting) made it difficult to interpret the multiple baseline design.
6. Was there clear reporting of the demographics of the participants in the study?	✔️
7. Was there clear reporting of clinical information of the participants?	✔️
8. Were the outcomes or follow up results of cases clearly reported?		✔️			Follow-up analyses were conducted approximately 19 weeks following the final CBC interview. Unclear if lack of substantial change in vegetable intake is a reflection of the target behavior chosen, measurement procedures, or specific intervention strategies used for that target behavior CBC process ranged from approx 6 to 8 weeks. Of the follow-up data collected, results were mixed for health beha…
9. Was there clear reporting of the presenting site(s)/clinic(s) demographic information?				✔️	Home/ school intervention
10. Was statistical analysis appropriate?	✔️				Multiple baseline design controls for threats to internal validity such as the effects of maturation or history. A multiple baseline approach is the most intensive and rigorous experimental design in single-subject research and has been found to be a highly reliable and valid research design
VERDICT: WEAK	4	4	1	1
Joanna Briggs Institute Critical Appraisal - Checklist for Qualitative Research
Cason-Wilkerson et al, 2015 "Healthy Living Program - HeLP"	Yes	No	Unclear	Not applicable	Comments
1. Is there congruity between the stated philosophical perspective and the research methodology?	✔️				Focus groups with low income Hispanic parents who participated (at least 8/12 sessions) in the Healthy Living Program (HeLP) - qualitative research methods are particularly well suited to understanding an intervention’s effectiveness as perceived by participants. The focus on treatment-seeking population adds to understanding of motivational factors that can facilitate healthy changes, types of b…
2. Is there congruity between the research methodology and the research question or objectives?	✔️				Aim: to understand the experience of low-income majority Hispanic families engaged in obesity treatment and how they integrated treatment goals into their lives.
3. Is there congruity between the research methodology and the methods used to collect data?	✔️				6x focus groups (2 = English, 4 = Spanish) with families who completed a community based, family-oriented obesity treatment program
4. Is there congruity between the research methodology and the representation and analysis of data?	✔️				Transcripts recorded, transcribed, and analyzed for thematic content. Two coders using software program ATLAS.ti coded each transcript independently; reflexive team analysis with three study team members used to reach a consensus
5. Is there congruity between the research methodology and the interpretation of results?	✔️				Identfied barrier and facilitator themes to program engagement and healthy behaviours
6. Is there a statement locating the researcher culturally or theoretically?		✔️			Conducted by a member of the research team fluent in both Spanish and English and trained in qualitative methods
7. Is the influence of the researcher on the research, and vice- versa, addressed?			✔️		Strength in rigor: Two coders coding 100% of focus group transcripts, in addition to consensus coding with a qualitative expert to ensure appropriateness of all analysis. all efforts were made to reduce this subjectivity during the analytic process through rigorous bracketing and reflexive team analysis
8. Are participants, and their voices, adequately represented?	✔️				37 parents from 33 families were recruited to focus groups - an understudied population of low-income minority participants at high risk of obesity and its complications, but in whom interventions are less well studied
9. Is the research ethical according to current criteria or, for recent studies, and is there evidence of ethical approval by an appropriate body?			✔️		The Colorado Multiple Institutional Review Board approved this study
10. Do the conclusions drawn in the research report flow from the analysis, or interpretation, of the data?	✔️
VERDICT: STRONG	7	1	2
[truncated: 41 more columns]

## Sheet: Table S2 BCTs with examples
Intervention strategy - Behaviour Change Technique (BCT)	Frequency	Citation	Theory	Example	Favoured intervention	Positive Trends
1. GOALS AND PLANNING
1.1 ‘Goal setting (behaviour)’		Fisher et al, 2018	Health Belief Model/ Competence Motivation Theory	Parents taught to set SMART goals	Diet
1.1 ‘Goal setting (behaviour)’		Yusop et al, 2018	Transtheoretical Model (Stages of Change)	At least two goals for diet and physical activity were determined	Diet and PA *only PA sig between groups
1.1 ‘Goal setting (behaviour)’	2	Siwik et al, 2013	Resilience Psychosocial Model	(i) Set goals to increase their total steps (ii) A TV turn-off challenge (children), support (parents)		PA. Follow up: Both at 18-24m *qualitative data
1.1 ‘Goal setting (behaviour)’		Wong & Cheng, 2013		In each session, the counselling was intentionally directive in pursuing the goal setting	Diet and PA *only PA sig between groups
1.1 ‘Goal setting (behaviour)’		Watson et al, 2015	Social Cognitive Theory	Setting long and medium-term goals with families. These may focus both on outcomes and behaviours.		Diet and PA *qualitative data
1.2 ‘Problem solving’		Fisher et al, 2018	Health Belief Model/ Competence Motivation Theory	Addressing barriers	Diet
1.2 ‘Problem solving'		Siwik et al, 2013	Resilience Psychosocial Model	Analyzing traps and providing steps to circumvent them		PA. Follow up: Both at 18-24m *qualitative data
1.2 ‘Problem solving’		Spurrier et al, 2016	Social Ecological Theory	Assessing current environment and identifying areas for change (e.g. via the Home Environment Inventory)		Diet and PA *Small effects within indiv families, not on group level
1.2 ‘Problem solving’		Wong & Cheng, 2013		Evaluating PA and diet habits and barriers affecting their weight loss	Diet and PA *only PA sig between groups
1.2 ‘Problem solving’	3	Watson et al, 2015	Social Cognitive Theory	(i) Target Time session on addressing barriers to healthy lifestyles; Problem solving when setting goals with families, e.g. If someone is struggling asking “what is stopping you doing this and how can it be overcome?” (ii) Discussing how families can free up time for physical activity; Group session with parents on planning meals in advance. (iii) Discussions during mentor chats to identify pote…		Diet and PA *qualitative data
1.3 ‘Goal-setting (outcome)’		Epstein et al, 2004	Behavioural Economic Theory	All participants were instructed to reduce hours of targeted sedentary activity to 15 or fewer per week	Diet and PA *within groups
1.3 ‘Goal setting (outcome)’		Spurrier et al, 2016	Social Ecological Theory	Changes identified by the home environment inventory were set as the intervention goals		Diet and PA *Small effects within indiv families, not on group level
1.3 ‘Goal setting (outcome)'		Wong & Cheng, 2013		Eating and exercise schemes figured out for children with parents (taking children's preferences into account) - involved evaluating current situation via diet journal and exercise log with self-guided goal-setting.	Diet and PA *only PA sig between groups
1.3 ‘Goal setting (outcome)'		Watson et al, 2015	Social Cognitive Theory	Setting long and medium-term goals with families. These may focus both on outcomes and behaviours.		Diet and PA *qualitative data
1.4 ‘Action planning’		Fisher et al, 2018	Health Belief Model/ Competence Motivation Theory	The framework was based on the five ‘SMART’ principles; specific, measurable, achievable, realistic and time-framed	Diet
1.4 ‘Action planning’		Watson et al, 2015	Social Cognitive Theory	Setting specific weekly goals with each family (i.e. what will be done, where and when).		Diet and PA *qualitative data
1.5 ‘Review behaviour (goal(s)’		Epstein et al, 1994	Social Learning	Caloric goals ranged from 900-1800 on Level 1, to 900- 1200 by Level 4. Calorie intake on Level 5 was individually adjusted based on maintenance requirements (similar structure for exercise goals).	Diet
1.5. ‘Review behaviour (goal(s)'		Wong & Cheng, 2013		Clarification of the plan of action	Diet and PA *only PA sig between groups
1.8 ‘Behavioural contract’		Epstein et al, 1994	Social Learning	Contracts written for advancement through level system. Parents and children wrote reciprocal contracts with activities (e.g., family outings) and privileges (e.g., staying up late)	Diet
1.8 ‘Behavioural contract’		Epstein et al, 2004	Behavioural Economic Theory	A contract reinforcement system to motivate children for behavior change. In the beginning of the program children and parents completed a reinforcer survey to select appropriate reinforcers and assign point values for the reinforcers. Small, medium, and large reinforcers could be earned for meeting behavior change goals for 1, 2, or 4 weeks, respectively	Diet and PA *within groups
1.8 ‘Behavioural contract’		Watson et al, 2015	Social Cognitive Theory	Asking families to sign a “promise sheet” during their final mentor session, outlining specific behaviours they will continue.		Diet and PA *qualitative data
1.9 ‘Commitment’		Siwik et al, 2013	Resilience Psychosocial Model	Children committed to a TV turn-off challenge; parents committed to support them.		PA. Follow up: Both at 18-24m *qualitative findings
2. FEEDBACK AND MONITORING
2.1 Monitoring of behaviour by others without feedback		Maddison et al, 2014	Social Cognitive Theory/ Behavioural Economic Theory	Parents encouraged to include self-monitoring. Time Machine’ TV monitoring devices to help budget child's media use. Each Time Machine came with 30 tokens, each worth 30 minutes of viewing time. Caregivers were able to allocate these as they chose		Diet and PA
2.2 ‘Feedback on behaviour’	2	Epstein et al, 1994	Social Learning	(i) Praise for program-related behaviours (ii) Children and parents kept daily food records which were used to provide feedback on caloric intake and nutritional adequacy of the diet. Exercise adherence was evaluated via self-monitoring in habit books.	Diet
2.2 ‘Feedback on behaviour’		Epstein et al, 2004	Behavioural Economic Theory	Parents were taught to review habit books during a daily meeting the parent had with the child	Diet and PA *within groups
2.2 ‘Feedback on behaviour’		Watson et al, 2015	Social Cognitive Theory	Feedback from food diaries; Providing specific verbal feedback when reviewing weekly goals; Providing feedback during Move It or Fun Foods sessions to correct technique, or confirm that an action is being performed correctly.		Diet and PA *qualitative data
2.3. ‘Self-monitoring of behaviour’		Siwik et al, 2013	Resilience Psychosocial Model	Over several sessions, children observed their TV behavior		PA. Follow up: Both at 18-24m *qualitative findings
2.3. ‘Self-monitoring of behaviour’		Watson et al, 2015	Social Cognitive Theory	Food diaries as part of initial assessment; Asking families to write down their progress towards their weekly goals.		Diet and PA *qualitative data
2.6 ‘Biofeedback’		Siwik et al, 2013	Resilience Psychosocial Model	In session one, children and a parent received pedometers, and instructions on their use. They reported steps in the second session		PA. Follow up: Both at 18-24m *qualitative findings
2.7 'Feedback on outcomes of behaviour'		Watson et al, 2015	Social Cognitive Theory	Following up families to review their goals on a weekly basis; Six-weekly mentor sessions to review weight outcomes and overall progress.		Diet and PA *qualitative data
2.7 'Feedback on outcomes of behaviour'		Yusop et al, 2018	Transtheoretical Model (Stages of Change)	Via nutrition counselling, participants were assessed and informed about their nutritional status, after which they were given advice on dietary intake and physical activity	Diet and PA *only PA sig between groups
3. SOCIAL SUPPORT
3.1 'Social Support (unspecified)'		Anderson et al, 2015	Self Determination	Encouraged to share their own healthy cooking techniques and culturally specific recipes via an interactice social media tool	Diet and PA
3.1 'Social Support (unspecified)'		Maddison et al, 2014	Social Cognitive Theory/ Behavioural Economic Theory	Inclusion of a participant website to facilitate information sharing.		Diet and PA
3.1 'Social Support (unspecified)'		Yusop et al, 2018	Transtheoretical Model (Stages of Change)	A ‘Sharing is Caring’ session was to encourage parents/ caregivers to share their experiences during the intervention period.	Diet and PA *only PA sig between groups
3.1 ‘Social support (unspecified)’		Siwik et al, 2013	Resilience Psychosocial Model	Support provided via a counselling session		PA. Follow up: Both at 18-24m *qualitative findings
3.1 ‘Social support (unspecified)		Spurrier et al, 2016	Social Ecological Theory	Supportive, nonjudgmental, sensitive listening to concerns and giving advice (e.g. suggesting where a family could access assistance such as a child psychologist, providing letters of support to state housing department)		Diet and PA *Small effects within indiv families, not on group level
3.1 ‘Social support (unspecified)’	4	Wong & Cheng, 2013		(i) Motivational interviewing. (ii) Help/ advice to guide and prevent a relapse, reinforce benefits of weight loss behaviour and provide resources to help maintain goals. (iii) Attention and reflective listening by nurse. (iv) Phoned parents to provide weight loss advice	Diet and PA *only PA sig between groups
3.1 ‘Social support (unspecified)’		Watson et al, 2015	Social Cognitive Theory	Trained staff used core skills of motivational interviewing throughout (e.g. empathy, rolling with resistance), particularly during one to one sessions.		Diet and PA *qualitative data
3.3 'Social support (emotional)'		Watson et al, 2015	Social Cognitive Theory	Whole family approach; Weekly goals aimed at involving non-attending family members (particularly if their actions are acting as a barrier to progress); Encouraging group to attend local activities together and help each other out (e.g. Provision of lifts).		Diet and PA *qualitative data
4. SHAPING KNOWLEDGE
4.1 ‘Instruction on how to perform the behaviour’		Yusop et al, 2018	Transtheoretical Model (Stages of Change)	A hands-on activity was conducted with the aim of increasing the participants’ knowledge about healthy food preparation. In the second hour of the exercise session, the instructor demonstrated activities or movements that would be feasible and enjoyable to perform at home as indoor exercise.	Diet and PA *only PA sig between groups
4.1 ‘Instruction on how to perform the behaviour’		Watson et al, 2015	Social Cognitive Theory	Teaching people how to read food labels or plan meals; Providing written advice and tips in handbooks; Teaching skills related to physical activity.		Diet and PA *qualitative data
4.2 ‘Information about Antecedents’		Spurrier et al, 2016	Social Ecological Theory	Assessing current environment and identifying areas for change (e.g. via the Home Environment Inventory)		Diet and PA *Small effects within indiv families, not on group level
5. NATURAL CONSEQUENCES
5.1 ‘Information about health consequences’		Wong & Cheng, 2013		Increased the children's awareness of the importance of weight loss as they were usually not prepared to change.	Diet and PA *only PA sig between groups
5.1 ‘Information about health consequences’	2	Watson et al, 2015	Social Cognitive Theory	(i) Written information about benefits of physical activity/healthy eating and dangers of being overweight in handbooks; Giving verbal information about physical activity/diet and health during group and one to one sessions. (ii) Visual demonstration of amount of fat and sugar in popular foods; Use of replica fat and models of clogging arteries to explain risks of obesity and physical inactivity.		Diet and PA *qualitative data
5.5. 'Anticipated regret'		Watson et al, 2015	Social Cognitive Theory	Communicating the message to participants they should make the most of this opportunity as it is only going to become more difficult to address the obesity as children get older.		Diet and PA *qualitative data
6. COMPARISON OF BEHAVIOUR
6.1 'Demonstration of the behaviour'		Anderson et al	Self Determination	Children and parents attended weekly sessions together to build relationships within and between families, allow parents to role model for their children	Diet and PA
6.1 ‘Demonstration of the behaviour’		Golan et al, 1998		Parental role modelling	Diet
6.1 ‘Demonstration of the behaviour’		Maddison et al, 2014	Social Cognitive Theory/ Behavioural Economic Theory	Role modelling and observational learning		Diet and PA
6.1 ‘Demonstration of the behaviour’		Yusop et al, 2018	Transtheoretical Model (Stages of Change)	A hands-on activity was conducted with the aim of increasing the participants’ knowledge about healthy food preparation. In the second hour of the exercise session, the instructor demonstrated activities or movements that would be feasible and enjoyable to perform at home as indoor exercise.	Diet and PA *only PA sig between groups
6.1 ‘Demonstration of the behaviour’		Spurrier et al, 2016	Social Ecological Theory	Parents being active every day, family members not eating in from of the TV (modelling)		Diet and PA *Small effects within indiv families, not on group level
6.1 ‘Demonstration of the behaviour’		Watson et al, 2015	Social Cognitive Theory	Demonstrating technique and showing how to play games during Move It; Staff as role-models.e.g. Showing a willingness to try new foods, joining in Move It.		Diet and PA *qualitative data
6.2 'Social comparison'	2	Watson et al, 2015	Social Cognitive Theory	(i) Giving messages during group and one to one sessions to help families understand they are not alone (e.g. “most children in the UK do not get enough physical activity”) and support the health messages given (e.g. “we have seen most success with families who really put in the effort at home”). (ii) Weekly group sessions provide opportunity to mix with others “in the same boat”; Move It session…		Diet and PA *qualitative data
8. REPETITION AND SUBSTITUTION
8.1 'Behavioural practice/ rehearsal'		Watson et al, 2015	Social Cognitive Theory	Mastering new cooking skills at GOALS, then setting a goal to try cooking the same meal at home; Signposting families to local physical activity sessions.		Diet and PA *qualitative data
8.2 ‘Behaviour substitution’		Maddison et al, 2014	Social Cognitive Theory/ Behavioural Economic Theory	Offering alternatives to screen-based media (such as playing board games, doing homework, arts and crafts, using one of the items from an activity pack, playing outside and being physically active), and links to community-based activity programs		Diet and PA
8.3 'Habit formation'		Watson et al, 2015	Social Cognitive Theory	Weekly goal setting is aimed at habit formation. Each goal is continued to prompt practice until it comes more easily.		Diet and PA *qualitative data
8.7 ‘Graded tasks’		Epstein et al, 1994	Social Learning	Parents and children had to master the behavioral skills at each level before advancement to the next level, which was also personalised.	Diet
8.7 ‘Graded tasks’		Epstein et al, 2004	Behavioural Economic Theory	The reinforcement group had shaping steps of 25, 20, and 15 hr per week to reduce their sedentary time	Diet and PA *within groups
8.7 'Graded tsaks'		Watson et al, 2015	Social Cognitive Theory	Breaking medium and long-term goals down into small manageable steps (e.g. if target is to reduce from 2 bags of crisps a day to 1 bag a week, the first step might be to reduce to 1 bag a day).		Diet and PA *qualitative data
9. COMPARISON OF OUTCOMES
9.2 'Pros and cons'		Watson et al, 2015	Social Cognitive Theory	Going through the BMI and growth charts, showing parents the extent of their child’s obesity and explaining the risks their child faces unless something changes; Decisional balance during Target Time session; Talking about positive outcomes of change during mentor/goal setting sessions (e.g. “eating breakfast will give you more energy in the morning”).		Diet and PA *qualitative data
10. REWARD AND THREAT
10.4 ‘Social Reward’		Epstein et al, 1994	Social Learning	Praise by parents for program-related behaviours	Diet
10.4 ‘Social reward’		Epstein et al, 2004	Behavioural Economic Theory	Families were taught to praise children for meeting goals	Diet and PA *within groups
10.4 ‘Social reward’		Maddison et al, 2014	Social Cognitive Theory/ Behavioural Economic Theory	Families were encouraged to use praise and positive reinforcement		Diet and PA
10.4 ‘Social reward’		Spurrier et al, 2016	Social Ecological Theory	Encouragement for continuing to make lifestyle changes was given at the final visit	Both *Small effects within indiv families, not on group level
10.8 'Incentive (outcome)'; includes ‘Positive reinforcement'		Epstein et al, 1994		Contracts written for advancement through level system. Parents and children wrote reciprocal contracts with activities (e.g., family outings) and privileges (e.g., staying up late)	Diet
10.8 'Incentive (outcome)'; includes ‘Positive reinforcement'		Epstein et al, 2004	Behavioural Economic Theory	A contract reinforcement system to motivate children for behavior change. In the beginning of the program children and parents completed a reinforcer survey to select appropriate reinforcers and assign point values for the reinforcers. Small, medium, and large reinforcers could be earned for meeting behavior change goals for 1, 2, or 4 weeks, respectively	Diet and PA *within groups
10.10 ‘Reward (outcome)'; includes ‘Positive reinforcement’		Epstein et al, 1994	Social Learning	Contracts were earned as reinforcers when both the participating parent and the child mastered the behavior changes and the weight loss requirement of a given level	Diet
10.10 ‘Reward (outcome)'; includes ‘Positive reinforcement’		Epstein et al, 2004	People fall into thinking traps, limiting problem-solving abilities. By analyzing traps and providing steps to circumvent them, participants gain accuracy in thinking and increase resilience. Dr. Shatte has applied this approach previously to treat and prevent depression. This model was adapted because of its relevance to children's beliefs about obesity, their behaviors, and themselves in relati…	Children in reinforcement group were provided points for reducing sedentary behaviors to no more than 15 hr per week. AND parents were encouraged to follow through on providing agreed rewards after all requirements of the contract were met.	Diet and PA *within groups
10.10 ‘Reward (outcome)’		Siwik et al, 2013	Resilience Psychosocial Model	Children who met their goals received a certificate of accomplishment		PA. Follow up: Both at 18-24m *qualitative findings
10.10 ‘Reward (outcome)’		Watson et al, 2015	Social Cognitive Theory	Allocating points when a weekly goal is achieved (points add up to earn tangible rewards).		Diet and PA *qualitative data
11. REGULATION
11.2 ‘Reduce negative emotions’		Siwik et al, 2013	Resilience Psychosocial Model	By analyzing traps and providing steps to circumvent them, participants gained accuracy in thinking and increased resilience. A previous model based on reliliency used to treat depression was adapted because of its relevance to children's beliefs about obesity, their behaviors, and themselves in relation to peers.		PA. Follow up: Both at 18-24m *qualitative findings
12. ANTECEDENTS
12.1 ‘Restructuring the physical environment’		Epstein et al, 1994	Social Learning	Parents were taught via information manuals how to reduce food cues for high calorie foods or for eating between meals; increase food cues for lower calorie, more healthful foods; decrease cues for inactivity; or increase cues for activity	Diet
12.1 ‘Restructuring the physical environment’		Golan et al, 1998		Parents were taught to alter the family sedentary lifestyle, provide a prudent diet (reduction of total and saturated fats, increase of mono-unsaturated fatty acids), decrease the family's exposure to food stimuli	Diet
12.1 ‘Restructuring the physical environment’		Maddison et al, 2014	Social Cognitive Theory/ Behavioural Economic Theory	Strategies in the home environment to reduce media use, e.g. ‘Time Machine’ utilised a TV locking mechanism to 'budget time'		Diet and PA
12.1 ‘Restructuring the physical environment’		Spurrier et al, 2016	Social Ecological Theory	Reducing children’s exposure to energy dense nutrient poor foods and increasing availability of fruit and vegetables in lunchboxes	Both *Small effects within indiv families, not on group level
12.1 ‘Restructuring the physical environment’		Wong & Cheng, 2013		Calls to parents focused on children's daily lifestyle and physical barriers due to the nature of the home environment. Suggestions given on how to modify their children's lifestyle behaviour and make the environmental change.	Diet and PA *only PA sig between groups
12.1 ‘Restructuring the physical environment’		Watson et al, 2015	Social Cognitive Theory	Discussed ways of restructuring the home environment to support change – e.g. put gym clothes out ready for the morning, have bowl of fruit on the table, remove tempting foods from house etc.		Diet and PA *qualitative data
12.3 ‘Avoidance/ reducing exposure to cues for the behaviour’		Epstein et al, 1994	Social Learning		Diet
12.3 ‘Avoidance/ reducing exposure to cues for the behaviour’		Golan et al, 1998		Parents were taught to alter the family sedentary lifestyle, provide a prudent diet (reduction of total and saturated fats, increase of mono-unsaturated fatty acids), decrease the family's exposure to food stimuli	Diet
13. IDENTITY
13.1 'Identification of self as role model'		Watson et al, 2015	Social Cognitive Theory	Parents encouraged to look at their own physical activity, diet and weight-related behaviours; Target Time session on positive role-modelling and supporting information in handbook; Parent discussion groups to allow sharing of ideas (i.e. “what worked for them”).		Diet and PA *qualitative data
13.2 ‘Framing/ reframing’	2	Wong & Cheng, 2013		Facilitated the expression of participants' ambivalence between their view of the problem and the solution (if children showed resistance). E.g. Monitoring children's degree of readiness to change, inviting them to examine new points of view.	Diet and PA *only PA sig between groups
15. SELF-BELIEF
15.3 ‘ Focus on past success’		Epstein et al, 2004	Behavioural Economic Theory	Discussed the participant's perceptions of what behavior change was related to the weight change	Diet and PA *within groups
15.3 ‘ Focus on past success’		Watson et al, 2015	Social Cognitive Theory	Increased confidence by asking families to think of a time they have successfully carried out a behaviour or made a change. Used particularly during Target Time sessions towards start of programme.		Diet and PA *qualitative data
15.4 ‘Self-talk’		Siwik et al, 2013	Resilience Psychosocial Model	Teaching materials for resilience-focused sessions on concepts (1) thoughts about problems impact our feelings; and (2) changing thoughts about situations can change emotional and behavioral response.		PA. Follow up: Both at 18-24m *qualitative findings
15.4 ‘Self-talk’		Wong & Cheng, 2013		Guided the children towards an acceptable resolution via eliciting and selectively reinforcing children's own self‐motivational statements around problem recognition, concern, desire and intention to change and ability to change	Diet and PA *only PA sig between groups
15.4 ‘Self-talk’		Watson et al, 2015	Social Cognitive Theory	Encouraging families to replace negative thoughts with more helpful thoughts (e.g. “I may not feel like exercising now, but I know it’ll make me feel better”). Used particularly during Target Time session about addressing barriers.		Diet and PA *qualitative data
